# Supplementary material for: Transcriptomic Analysis of Flowering Time Genes in Cultivated Chickpea and Wild Cicer
Source: MDPI journal article supplement (doi:10.3390/ijms24032692), 2023-01-31
Supplement: s1 [file s1]

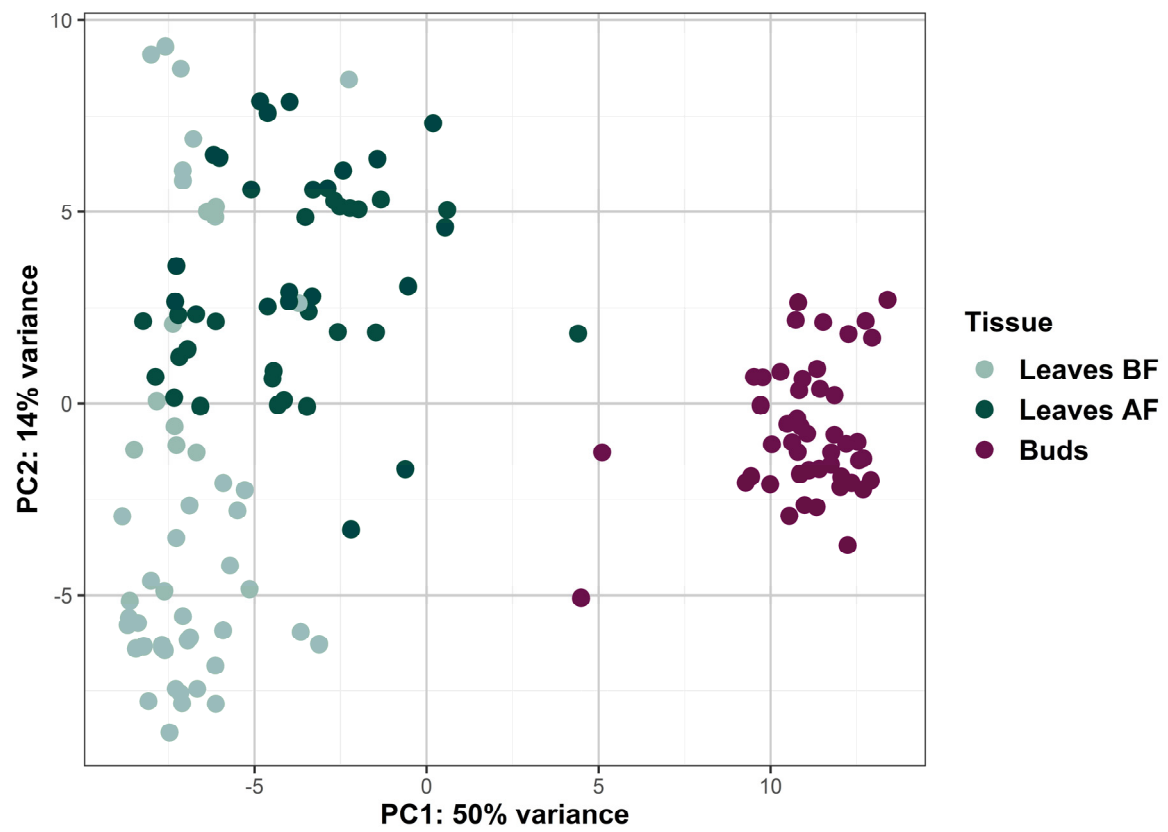

**Supplementary Figure S1:** Principal component analysis (PCA) plot which resolves samples 558 according to the tissue type.
