# Supplementary material for: Transcriptomic Analysis of Flowering Time Genes in Cultivated Chickpea and Wild Cicer
Source: MDPI journal article supplement (doi:10.3390/ijms24032692), 2023-01-31
Supplement: s1 [file s1]

**Supplementary Table 2: Primer Details**

| CA_ID     | Name  | Primer sequence (5' to 3') | Tm |
|-----------|-------|----------------------------|----|
| Ca_01365  | LHY   | F: GACTGATGCGTTGGAGAA      | 54 |
|           |       | R: ACACCTGCCTGGAGAATA      | 54 |
| Ca_01386  | LFY   | F: GTTGACCGTGATGAGAAT      | 52 |
|           |       | R: GGCATTGTTCGTAGAGAT      | 52 |
| Ca_TFL1c2 | TFL1c | F: CCAGGCACAACAGATT        | 48 |
|           |       | R: AAGGACGAACACATACC       | 50 |
| Ca_FTa1   | FTa1  | F: GGCGTAGGAGTGTAAGAA      | 54 |
|           |       | R: TGATTGGCAACTTGAGAAG     | 54 |
