# Supplementary material for: Transcriptomic Analysis of Flowering Time Genes in Cultivated Chickpea and Wild Cicer
Source: Int J Mol Sci. 2023 Jan 31;24(3):2692. doi: 10.3390/ijms24032692 (PMC9916832; doi:10.3390/ijms24032692)
Supplement: Supplementary file 1 [file ijms-24-02692-s001.zip]

Archive with 9 entries (9 files):
- Supplementary Figure S1.pdf
- Supplementary Table S1.xlsx
- Supplementary Table S2.pdf
- Supplementary Table S3.xlsx
- Supplementary Table S4.xlsx
- Supplementary Table S5.xlsx
- Supplementary Table S6.xlsx
- Supplementary Table S7.xlsx
- Supplementary Table S8.xlsx
