# Supplementary material for: Transcriptomic Analysis of Flowering Time Genes in Cultivated Chickpea and Wild Cicer
Source: Int J Mol Sci. 2023 Jan 31;24(3):2692. doi: 10.3390/ijms24032692 (PMC9916832; doi:10.3390/ijms24032692)
Supplement: Supplementary file 1 [file ijms-24-02692-s001.zip › Supplementary Table S1.xlsx]

## Sheet: Лист1
The list of Cicer orthologs of Arabidopsis flowering time genes used in the analysis
CA_ID	AT_ID	Copy_number	Pathway	Name	Alias
Ca_01367	AT1G01040	1	AUTONOMOUS	ASU1,ATDCL1,CAF,DCL1,EMB60,EMB76,SIN1,SUS1	DCL1
Ca_01365	AT1G01060	1	PHOTOPERIOD + CIRCADIAN CLOCK	LHY,LHY1	LHY
Ca_03533	AT1G02400	1	HORMONE	ATGA2OX4,ATGA2OX6,DTA1,GA2OX6	GA2OX6
Ca_01566	AT1G02740	1	AUTONOMOUS	MRG2	MRG2
Ca_26523	AT1G04870	1	AUTONOMOUS	ATPRMT10,PRMT10	PRMT10
Ca_18793	AT1G05830,AT2G31650	1	AUTONOMOUS	ATX2,SDG30,ATX1,SDG27	ATX1,ATX2
Ca_13690	AT1G06040	1	PHOTOPERIOD + CIRCADIAN CLOCK	BBX24,STO	STO
Ca_14563	AT1G08260	1	AUTONOMOUS	ABA OVERLY SENSITIVE 4, ABO4, EARLY IN SHORT DAYS 7, EMB142, EMB2284, EMB529, EMBRYO DEFECTIVE 142, EMBRYO DEFECTIVE 2284, EMBRYO DEFECTIVE 529, ESD7, POL2A, TIL1, TILTED 1	ESD7
Ca_01175	AT1G08970	1	PHOTOPERIOD + CIRCADIAN CLOCK	HAP5C,NF-YC9	NF-YC9
Ca_09212	AT1G10120	1	PHOTOPERIOD + CIRCADIAN CLOCK	NUCLEAR FACTOR Y, SUBUNIT A1", ATHAP2A, ATNFYA1, EMB2220, EMBRYO DEFECTIVE 2220, HAP2A, NF-YA1, NFYA1, NUCLEAR FACTOR Y SUBUNIT A2	NF-YA1
Ca_08271	AT1G12910	1	PHOTOPERIOD + CIRCADIAN CLOCK	ATAN11, LWD1	NF-YA1
Ca_02845	AT1G15550	1	HORMONE	ATGA3OX1,GA3OX1,GA4	GA3OX1
Ca_19692	AT1G17760	1	VERNALIZATION + TEMPERATURE	ATCSTF77,CSTF77	CSTF77
Ca_17177	AT1G18450	1	AUTONOMOUS	ARP4,ATARP4	ARP4
Ca_04964	AT1G19330	1	PHOTOPERIOD + CIRCADIAN CLOCK	AFR2	AFR2
Ca_04359	AT1G22770	1	PHOTOPERIOD + CIRCADIAN CLOCK	FB,GI	GI
Ca_26298	AT1G25540	1	PHOTOPERIOD + CIRCADIAN CLOCK	MED25,PFT1	PFT1
Ca_24123	AT1G25560	1	DEVELOPMENT	ATTEM1, EDF1, ETHYLENE RESPONSE DNA BINDING FACTOR 1, TEM1, TEMPRANILLO 1	TEM1
Ca_06361	AT1G28520	1	PHOTOPERIOD + CIRCADIAN CLOCK	ATVOZ1,VOZ1	VOZ1
Ca_00497	AT1G30040	1	HORMONE	ATGA2OX2,GA2OX2	GA2OX2
Ca_10388	AT1G30970	1	VERNALIZATION + TEMPERATURE	SUF4	SUF4
Ca_03051	AT1G47990	1	HORMONE	ATGA2OX4,GA2OX4	GA2OX4
Ca_11156	AT1G51450	1	VERNALIZATION + TEMPERATURE	ASH2R,TRO	ASH2R
Ca_10923	AT1G52740	1	AUTONOMOUS	HTA9	HTA9
Ca_06865	AT1G53090,AT3G15354	1	PHOTOPERIOD + CIRCADIAN CLOCK	SPA3,SPA4	SPA3,SPA4
Ca_08206	AT1G54440,AT5G35910	1	AUTONOMOUS	RRP6L1, RRP6L2	RRP6L1, RRP6L2
Ca_17826	AT1G55250	1	VERNALIZATION + TEMPERATURE	HUB2	HUB2
Ca_09815	AT1G57820,AT5G39550	1	AUTONOMOUS	ORTH2,VIM1,ORTH1,VIM3	VIM1,VIM3
Ca_14499	AT1G60220	1	AUTONOMOUS	OTS1,ULP1D	OTS1
Ca_12381	AT1G69120	1	INTEGRATORS + MAIN TARGETS	AGL7,AP1,AtAP1	AP1
Ca_16163	AT1G72390	1	PHOTOPERIOD + CIRCADIAN CLOCK	PHL	PHL
Ca_04367	AT1G76710	1	AUTONOMOUS	ASHH1,SDG26	SDG26
Ca_03889	AT1G77300	1	AUTONOMOUS	ASHH2,CCR1,EFS,LAZ2,SDG8	EFS
Ca_23533	AT1G79430	1	PHOTOPERIOD + CIRCADIAN CLOCK	APL,WDY,FE	FE
Ca_23529	AT1G79460	1	HORMONE	ATKS,ATKS1,GA2,KS,KS1	GA2
Ca_10139	AT1G79730	1	AUTONOMOUS	ELF7	ELF7
Ca_15344	AT2G02760	1	AUTONOMOUS	ATUBC2,UBC2	UBC2
Ca_06627	AT2G03500	1	VERNALIZATION + TEMPERATURE	EARLY FLOWERING MYB PROTEIN, EFM, HHO4, HRS1 HOMOLOG4	EFM
Ca_23894	AT2G13540	1	AUTONOMOUS	ABH1,ATCBP80,CBP80,ENS	CBP80
Ca_08096	AT2G18790	1	PHOTOPERIOD + CIRCADIAN CLOCK	PHYB, HY3, OOP1	PHYB
Ca_02452	AT2G20570	1	AUTONOMOUS	ATGLK1,GLK1,GPRI1	GLK1
Ca_05130	AT2G21070	1	PHOTOPERIOD + CIRCADIAN CLOCK	FIO1,FIO1,FIO1	FIO1
Ca_15371	AT2G21660	1	AUTONOMOUS	ATGRP7,CCR2,GR-RBP7,GRP7	GRP7
Ca_17349	AT2G22370	1	AUTONOMOUS	MED18	MED18
Ca_12416	AT2G22540	1	INTEGRATORS + MAIN TARGETS	AGL22,FAQ1,SVP	SVP
Ca_02166	AT2G23380	1	INTEGRATORS + MAIN TARGETS	CLF,ICU1,SDG1,SET1	CLF
Ca_01620	AT2G25930	1	PHOTOPERIOD + CIRCADIAN CLOCK	ELF3,PYK20	ELF3
Ca_14618	AT2G28550	1	DEVELOPMENT	RAP2.7,TOE1	TOE1
Ca_17820	AT2G32950	1	PHOTOPERIOD + CIRCADIAN CLOCK	ATCOP1,COP1,DET340,EMB168,FUS1	COP1
Ca_00324	AT2G33835	1	VERNALIZATION + TEMPERATURE	FES1	FES1
Ca_00392	AT2G34140	1	PHOTOPERIOD + CIRCADIAN CLOCK	CDF4	CDF4
Ca_07860	AT2G38880	1	PHOTOPERIOD + CIRCADIAN CLOCK	ATHAP3,ATNF-YB1,HAP3,HAP3A,NF-YB1	NF-YB1
Ca_02330	AT2G39810	1	PHOTOPERIOD + CIRCADIAN CLOCK	ESD6,HOS1	HOS1
Ca_13416	AT2G40080	1	PHOTOPERIOD + CIRCADIAN CLOCK	ELF4	ELF4
Ca_07299	AT2G42200	1	DEVELOPMENT	AtSPL9,SPL9	SPL9
Ca_14223	AT2G42280	1	PHOTOPERIOD + CIRCADIAN CLOCK	AKS3,FBH4	FBH4
Ca_21576	AT2G43010	1	PHOTOPERIOD + CIRCADIAN CLOCK	ATPIF4, PHYTOCHROME INTERACTING FACTOR 4, PIF4, SRL2	PIF4
Ca_13686	AT2G43410	1	AUTONOMOUS	FPA	FPA
Ca_22505	AT2G44950	1	AUTONOMOUS	HUB1,RDO4	HUB1
Ca_19592	AT2G45430	1	PHOTOPERIOD + CIRCADIAN CLOCK	AHL22
Ca_06280	AT2G45650	1	DEVELOPMENT	AGL6,RSB1	AGL6
Ca_07850	AT2G48160	1	AUTONOMOUS	HUA and HUA-LIKE (HULK)Â	HULK2
Ca_12538	AT3G01460	1	AUTONOMOUS	ATMBD9,MBD9	MBD9
Ca_07058	AT3G04030	1	PHOTOPERIOD + CIRCADIAN CLOCK	MYR2	MYR2
Ca_01245	AT3G04610	1	AUTONOMOUS	FLK	FLK
Ca_03719	AT3G05120	1	HORMONE	ATGID1A, GID1A	GID1A
Ca_07641	AT3G07650	1	PHOTOPERIOD + CIRCADIAN CLOCK	BBX7,COL9	COL9
Ca_14192	AT3G12810	1	VERNALIZATION + TEMPERATURE	CHR13,PIE1,SRCAP	PIE1
Ca_16243	AT3G15270	1	DEVELOPMENT	SPL5	SPL5
Ca_13671	AT3G18990	1	VERNALIZATION + TEMPERATURE	REM39,VRN1	VRN1
Ca_13071	AT3G20740	1	VERNALIZATION + TEMPERATURE	FIE,FIE1,FIS3	FIE1
Ca_18903	AT3G20810	1	PHOTOPERIOD + CIRCADIAN CLOCK	JMJ30,JMJD5	JMJ30
Ca_04608	AT3G22380	1	PHOTOPERIOD + CIRCADIAN CLOCK	TIC	TIC
Ca_11844	AT3G22590	1	VERNALIZATION + TEMPERATURE	CDC73,PHP	PHP
Ca_01394	AT3G26744	1	VERNALIZATION + TEMPERATURE	ICE1	ICE1
Ca_10518	AT3G28910	1	AUTONOMOUS	ATMYB30,MYB30	MYB30
Ca_26796	AT3G33520	1	AUTONOMOUS	ARP6,ATARP6,ESD1,SUF3	ESD1
Ca_01677	AT3G43920	1	AUTONOMOUS	ATDCL3,DCL3	DCL3
Ca_16458	AT3G44680	1	AUTONOMOUS	AtHDA9,HDA09,HDA9	HDA9
Ca_10686	AT3G45880	1	AUTONOMOUS	JMJ32, JUMONJI 32	JMJ32
Ca_16282	AT3G46640	1	PHOTOPERIOD + CIRCADIAN CLOCK	LUX,PCL1	LUX
Ca_25929	AT3G47500	1	PHOTOPERIOD + CIRCADIAN CLOCK	CDF3	CDF3
Ca_08787	AT3G48430	1	AUTONOMOUS	JMJ12,REF6	REF6
Ca_06844	AT3G49660	1	VERNALIZATION + TEMPERATURE	AtWDR5a,WDR5a	WDR5a
Ca_27770	AT3G54500	1	PHOTOPERIOD + CIRCADIAN CLOCK	LNK2	LNK2
Ca_07792	AT3G54560	1	AUTONOMOUS	HTA11	HTA11
Ca_19854	AT3G57390	1	PHOTOPERIOD + CIRCADIAN CLOCK	AGL18	AGL18
Ca_01290	AT3G61600	1	VERNALIZATION + TEMPERATURE	LRB2	LRB2
Ca_17781	AT3G61600	1	VERNALIZATION + TEMPERATURE	LRB2, POB1
Ca_04270	AT4G00650	1	VERNALIZATION + TEMPERATURE	FLA,FRI,RSB7	FRI
Ca_00942	AT4G02560	1	VERNALIZATION + TEMPERATURE	LD	LD
Ca_07381	AT4G02780	1	HORMONE	ABC33,ATCPS1,CPS,CPS1,GA1	GA1
Ca_16716	AT4G03090	1	VERNALIZATION + TEMPERATURE	AtNDX,NDX	NDX
Ca_25923	AT4G08920	1	PHOTOPERIOD + CIRCADIAN CLOCK	CRY1, BLU1, HY4, OOP2, ATCRY1	CRY1
Ca_15058	AT4G10180	1	PHOTOPERIOD + CIRCADIAN CLOCK	ATDET1,DET1,FUS2	DET1
Ca_13253	AT4G10710	1	VERNALIZATION + TEMPERATURE	GLOBAL TRANSCRIPTION FACTOR C, SPT16	SPT16
Ca_09721	AT4G14540	1	PHOTOPERIOD + CIRCADIAN CLOCK	NUCLEAR FACTOR Y, SUBUNIT B3", NF-YB3	NF-YB3
Ca_02957	AT4G15880	1	AUTONOMOUS	ATESD4,ESD4	ESD4
Ca_03031	AT4G16280	1	VERNALIZATION + TEMPERATURE	FCA,FCA	FCA
Ca_02321	AT4G16845	1	VERNALIZATION + TEMPERATURE	VRN2	VRN2
Ca_22572	AT4G18130	1	PHOTOPERIOD + CIRCADIAN CLOCK	PHYE	PHYE
Ca_11893	AT4G21200	1	HORMONE	ATGA2OX8,GA2OX8	GA2OX8
Ca_16230	AT4G22140	1	PHOTOPERIOD + CIRCADIAN CLOCK	EBS	EBS
Ca_14997	AT4G24620	1	SUGAR	PGI,PGI1	PGI
Ca_07472	AT4G24680	1	AUTONOMOUS	MOS1	MOS1
Ca_25805	AT4G25420	1	HORMONE	GA5, GA20OX1, AT2301, ATGA20OX1	GA20OX1
Ca_19014	AT4G28190	1	INTEGRATORS + MAIN TARGETS	ULT,ULT1	ULT1
Ca_17861	AT4G29130	1	SUGAR	ATHXK1,GIN2,HXK1	HXK1
Ca_03165	AT4G29830	1	VERNALIZATION + TEMPERATURE	SKI8,VIP3	VIP3
Ca_03238	AT4G30200	1	VERNALIZATION + TEMPERATURE	VEL1,VIL2	VIL2
Ca_09180	AT4G32980	1	DEVELOPMENT	ATH1	ATH1
Ca_04778	AT4G34530	1	PHOTOPERIOD + CIRCADIAN CLOCK	CIB1	CIB1
Ca_09295	AT4G36920	1	INTEGRATORS + MAIN TARGETS	AP2,AtAP2,FL1,FLO2	AP2
Ca_04760	AT4G39100	1	DEVELOPMENT	SHL1	SHL1
Ca_08477	AT5G04240	1	PHOTOPERIOD + CIRCADIAN CLOCK	ELF6	ELF6
Ca_20335	AT5G09740,AT5G64610	1	AUTONOMOUS	HAC11,HAG05,HAG5,HAM2,HAM1	HAM1,HAM2
Ca_01893	AT5G11530	1	VERNALIZATION + TEMPERATURE	EMF1	EMF1
Ca_15574	AT5G12840	1	PHOTOPERIOD + CIRCADIAN CLOCK	ATHAP2A,AtNFYA1,EMB2220,HAP2A,NF-YA1,NFYA1	NF-YA1
Ca_17996	AT5G13480	1	AUTONOMOUS	FY	FY
Ca_24925	AT5G13790	1	PHOTOPERIOD + CIRCADIAN CLOCK	AGL15	AGL15
Ca_11760	AT5G17690	1	DEVELOPMENT	AtLHP1,LHP1,TFL2	LHP1
Ca_06761	AT5G20320	1	AUTONOMOUS	ATDCL4,DCL4	DCL4
Ca_11094	AT5G23150	1	AUTONOMOUS	HUA2	HUA2
Ca_04056	AT5G24470	1	PHOTOPERIOD + CIRCADIAN CLOCK	APRR5,PRR5	PRR5
Ca_20931	AT5G35910	1	AUTONOMOUS	RRP6L2	RRP6L2
Ca_08985	AT5G37055	1	AUTONOMOUS	ATSWC6,SEF	SEF
Ca_22383	AT5G39660	1	PHOTOPERIOD + CIRCADIAN CLOCK	CDF2	CDF2
Ca_17359	AT5G42400	1	VERNALIZATION + TEMPERATURE	ATXR7,SDG25	ATXR7
Ca_02450	AT5G44200	1	VERNALIZATION + TEMPERATURE	ATCBP20,CBP20	CBP20
Ca_17515	AT5G45600	1	VERNALIZATION + TEMPERATURE	GAS41,TAF14B,YAF9a	YAF9a
Ca_00493	AT5G46210	1	AUTONOMOUS	ATCUL4,CUL4	CUL4
Ca_14728	AT5G49020	1	AUTONOMOUS	ATPRMT4A,PRMT4A	PRMT4A
Ca_08335	AT5G51230	1	INTEGRATORS + MAIN TARGETS	AtEMF2,CYR1,EMF2,VEF2	EMF2
Ca_04521	AT5G51810	1	HORMONE	AT2353,ATGA20OX2,GA20OX2	GA20OX2
Ca_03275	AT5G57660	1	PHOTOPERIOD + CIRCADIAN CLOCK	ATCOL5,BBX6,COL5	COL5
Ca_05144	AT5G58230	1	INTEGRATORS + MAIN TARGETS	ATMSI1,MEE70,MSI1	MSI1
Ca_24787	AT5G59560	1	PHOTOPERIOD + CIRCADIAN CLOCK	SENSITIVITY TO RED LIGHT REDUCED 1, SRR1	SRR1
Ca_13199	AT5G61060	1	AUTONOMOUS	ATHDA5,HDA05,HDA5	HDA5
Ca_25764	AT5G61150	1	VERNALIZATION + TEMPERATURE	VIP4	VIP4
Ca_13165	AT5G61380	1	PHOTOPERIOD + CIRCADIAN CLOCK	APRR1,AtTOC1,PRR1,TOC1	TOC1
Ca_01386	AT5G61850	1	DEVELOPMENT	LFY,LFY3	LFY
Ca_19775	AT5G62040	1	DEVELOPMENT	BFT	BFT
Ca_04212	AT5G63960	1	AUTONOMOUS	MB2780, EMBRYO DEFECTIVE 2780, GIGANTEA SUPPRESSOR5, GIS5	GIS5
Ca_00127	AT5G64170	1	PHOTOPERIOD + CIRCADIAN CLOCK	LNK1	LNK1
Ca_17550	AT5G64960	1	AUTONOMOUS	CDKC2,CDKC;2	CDKC2
Ca_21130		1	PHOTOPERIOD + CIRCADIAN CLOCK	AS1,ATMYB91,ATPHAN,MYB91	AS1
Ca_12132	AT1G04400	2	PHOTOPERIOD + CIRCADIAN CLOCK	CRY2, FHA, AT-PHH1, PHH1, ATCRY2	CRY2a
Ca_23164	AT1G04400	2	PHOTOPERIOD + CIRCADIAN CLOCK	CRY2, FHA, AT-PHH1, PHH1, ATCRY2	CRY2b
Ca_01069	AT1G09570	2	PHOTOPERIOD + CIRCADIAN CLOCK	FHY2,FRE1,HY8,PHYA	PHYAa
Ca_03582	AT1G09570	2	PHOTOPERIOD + CIRCADIAN CLOCK	FHY2,FRE1,HY8,PHYA	PHYAb
Ca_05046	AT1G14920	2	HORMONE	GAI,RGA2	GAIa
Ca_13295	AT1G14920	2	HORMONE	GAI,RGA2	GAIb
Ca_11477	AT1G32230	2	AUTONOMOUS	ATP8,AtRCD1,CEO,CEO1,RCD1	RCD1a
Ca_18106	AT1G32230	2	AUTONOMOUS	ATP8,AtRCD1,CEO,CEO1,RCD1	RCD1b
Ca_10410	AT1G68050	2	PHOTOPERIOD + CIRCADIAN CLOCK	ADO3,FKF1	FKF1a
Ca_17342	AT1G68050	2	PHOTOPERIOD + CIRCADIAN CLOCK	ADO3,FKF1	FKF1b
Ca_02746	AT2G19520	2	AUTONOMOUS	ACG1,ATMSI4,FVE,MSI4,NFC04,NFC4	FVEa
Ca_20629	AT2G19520	2	AUTONOMOUS	ACG1,ATMSI4,FVE,MSI4,NFC04,NFC4	FVEb
Ca_02096	AT2G23740	2	AUTONOMOUS	SUVR5	SUVR5a
Ca_16024	AT2G23740	2	AUTONOMOUS	SUVR5	SUVR5b
Ca_06189	AT2G46020	2	AUTONOMOUS	ATBRM,BRM,CHA2,CHR2	CHR2a
Ca_13738	AT2G46020	2	AUTONOMOUS	ATBRM,BRM,CHA2,CHR2	CHR2b
Ca_15024	AT2G46340	2	PHOTOPERIOD + CIRCADIAN CLOCK	SPA1	SPA1a
Ca_21260	AT2G46340	2	PHOTOPERIOD + CIRCADIAN CLOCK	SPA1	SPA1b
Ca_10492	AT3G01090	2	SUGAR	AKIN10,KIN10,SNRK1.1	AKIN10a
Ca_22087	AT3G01090	2	SUGAR	AKIN10,KIN10,SNRK1.1	AKIN10b
Ca_10271	AT3G11910,AT5G06600	2	AUTONOMOUS	AtUBP13,UBP13,AtUBP12,UBP12	UBP12,UBP13a
Ca_20365	AT3G11910,AT5G06600	2	AUTONOMOUS	AtUBP13,UBP13,AtUBP12,UBP12	UBP12,UTP13b
Ca_12986	AT3G24440	2	VERNALIZATION + TEMPERATURE	VIL1,VRN5	VRN5a
Ca_25247	AT3G24440	2	VERNALIZATION + TEMPERATURE	VIL1,VRN5	VRN5b
Ca_10804	AT3G28730	2	VERNALIZATION + TEMPERATURE	ATHMG,HMG,NFD,SSRP1	NFDa
Ca_12487	AT3G28730	2	VERNALIZATION + TEMPERATURE	ATHMG,HMG,NFD,SSRP1	NFDb
Ca_15207	AT3G44110	2	DEVELOPMENT	ATJ,ATJ3,J3	ATJ3a
Ca_18949	AT3G44110	2	DEVELOPMENT	ATJ,ATJ3,J3	ATJ3b
Ca_01827	AT3G49600	2	AUTONOMOUS	ATUBP26,SUP32,UBP26	UBP26a
Ca_10963	AT3G49600	2	AUTONOMOUS	ATUBP26,SUP32,UBP26	UBP26b
Ca_07218	AT3G57300	2	AUTONOMOUS	ATINO80,INO80	INO80a
Ca_24030	AT3G57300	2	AUTONOMOUS	ATINO80,INO80	INO80b
Ca_07341	AT3G63010	2	HORMONE	ATGID1B,GID1B	GID1Ba
Ca_08305	AT3G63010	2	HORMONE	ATGID1B,GID1B	GID1Bb
Ca_06206	AT4G00450	2	AUTONOMOUS	CCT,CRP,MED12	MED12a
Ca_13756	AT4G00450	2	AUTONOMOUS	CCT,CRP,MED12	MED12b
Ca_00287	AT4G04920	2	AUTONOMOUS	AtSFR6,IEN1,MED16,SFR6,YID1	MED16a
Ca_06297	AT4G04920	2	AUTONOMOUS	AtSFR6,IEN1,MED16,SFR6,YID1	MED16b
Ca_02432	AT4G23100	2	AUTONOMOUS	ATECS1,AtGSH1,CAD2,GSH1,GSHA,PAD2,RML1	CAD2a
Ca_05741	AT4G23100	2	AUTONOMOUS	ATECS1,AtGSH1,CAD2,GSH1,GSHA,PAD2,RML1	CAD2b
Ca_05924	AT4G29130	2	SUGAR	ATHXK1,GIN2,HXK1	HXK1a
Ca_10135	AT4G29130	2	SUGAR	ATHXK1,GIN2,HXK1	HXK1b
Ca_01826	AT4G31120	2	AUTONOMOUS	ATPRMT5,PRMT5,SKB1	PRMT5a
Ca_10955	AT4G31120	2	AUTONOMOUS	ATPRMT5,PRMT5,SKB1	PRMT5b
Ca_04520	AT5G51820	2	SUGAR	ATPGMP,PGM,PGM1,STF1	PGM1a
Ca_10439	AT5G51820	2	SUGAR	ATPGMP,PGM,PGM1,STF1	PGM1b
Ca_02515	AT5G60410	2	AUTONOMOUS	ATSIZ1,SIZ1	SIZ1a
Ca_14593	AT5G60410	2	AUTONOMOUS	ATSIZ1,SIZ1	SIZ1b
Ca_07461	AT5G63110	2	AUTONOMOUS	ATHDA6,AXE1,HDA6,RPD3B,RTS1,SIL1	HDA6a
Ca_11932	AT5G63110	2	AUTONOMOUS	ATHDA6,AXE1,HDA6,RPD3B,RTS1,SIL1	HDA6b
Ca_08468	AT2G28830,AT3G46510	3	AUTONOMOUS	AtPUB12,PUB12,ATPUB13,PUB13	PUB12,PUB13a
Ca_16689	AT2G28830,AT3G46510	3	AUTONOMOUS	AtPUB12,PUB12,ATPUB13,PUB13	PUB12,PUB13b
Ca_21525	AT2G28830,AT3G46510	3	AUTONOMOUS	AtPUB12,PUB12; ATPUB13,PUB13	PUB12,PUB13c
Ca_10524	AT1G26830	3	VERNALIZATION + TEMPERATURE	ATCUL3,ATCUL3A,CUL3,CUL3A	CUL3a
Ca_18760	AT1G26830	3	VERNALIZATION + TEMPERATURE	ATCUL3,ATCUL3A,CUL3,CUL3A	CUL3b
Ca_19473	AT1G26830	3	VERNALIZATION + TEMPERATURE	ATCUL3,ATCUL3A,CUL3,CUL3A	CUL3c
Ca_06286	AT1G61040	3	VERNALIZATION + TEMPERATURE	VIP5	VIP5a
Ca_12282	AT1G61040	3	VERNALIZATION + TEMPERATURE	VIP5	VIP5b
Ca_27247	AT1G61040	3	VERNALIZATION + TEMPERATURE	VIP5	VIP5c
Ca_25061	AT1G62830,AT3G10390,AT3G13682	3	AUTONOMOUS	ATLSD1,ATSWP1,LDL1,LSD1,SWP1,FLD,LDL2	LDL1,LDL2,FLD
Ca_25314	AT1G62830,AT3G10390,AT3G13682	3	AUTONOMOUS	ATLSD1,ATSWP1,LDL1,LSD1,SWP1,FLD,LDL2	LDL1,LDL2,FLD
Ca_12996	AT1G62830,AT3G13682,AT3G10390	3	AUTONOMOUS	ATLSD1,ATSWP1,LDL1,LSD1,SWP1,FLD,LDL2	LDL1,LDL2,FLD
Ca_19141	AT1G65480	3	DEVELOPMENT	FT,RSB8	FTa3
Ca_FTa1	AT1G65480	3	DEVELOPMENT	FT,RSB8	FTa1
Ca_FTb	AT1G65480	3	DEVELOPMENT	FT,RSB8	FTb
Ca_08642	AT1G78580	3	SUGAR	ATTPS1,TPS1	TPS1a
Ca_12942	AT1G78580	3	SUGAR	ATTPS1,TPS1	TPS1b
Ca_26853	AT1G78580	3	SUGAR	ATTPS1,TPS1	TPS1c
Ca_02889	AT1G80070	3	VERNALIZATION + TEMPERATURE	EMB14,EMB177,EMB33,SUS2,PRP8	PRP8a
Ca_15590	AT1G80070	3	VERNALIZATION + TEMPERATURE	EMB14,EMB177,EMB33,SUS2,PRP8	PRP8b
Ca_19745	AT1G80070	3	VERNALIZATION + TEMPERATURE	EMB14,EMB177,EMB33,SUS2,PRP8	PRP8c
Ca_03831	AT2G34880,AT4G20400	3	AUTONOMOUS	JMJ14,PKDM7B; JMJ15,MEE27,PKDM7C	JMJ14.JMJ15c
Ca_16748	AT2G34880,AT4G20400	3	AUTONOMOUS	JMJ14,PKDM7B; JMJ15,MEE27,PKDM7C	JMJ14,LMJ15a
Ca_18608	AT2G34880,AT4G20400	3	AUTONOMOUS	JMJ14,PKDM7B; JMJ15,MEE27,PKDM7C	JMJ14.JMJ15b
Ca_TFL1b	AT5G03840	3	DEVELOPMENT	TFL1	TFL1b
Ca_TFL1c2	AT5G03840	3	DEVELOPMENT	TFL1	TFL1c2
Ca_TFL1c3	AT5G03840	3	DEVELOPMENT	TFL1	TFL1c3
Ca_04321	AT5G06170	3	SUGAR	ATSUC9,SUC9	SUC9a
Ca_21044	AT5G06170	3	SUGAR	ATSUC9,SUC9	SUC9b
Ca_27098	AT5G06170	3	SUGAR	ATSUC9,SUC9	SUC9c
Ca_08760	AT5G14170	3	AUTONOMOUS	CHC1	CHC1a
Ca_14647	AT5G14170	3	AUTONOMOUS	CHC1	CHC1b
Ca_16660	AT5G14170	3	AUTONOMOUS	CHC1	CHC1c
Ca_03357	AT5G48300	4	SUGAR	ADG1,APS1	APS1a
Ca_04935	AT5G48300	4	SUGAR	ADG1,APS1	APS1b
Ca_07632	AT5G48300	4	SUGAR	ADG1,APS1	APS1c
Ca_09767	AT5G48300	4	SUGAR	ADG1,APS1	APS1d
Ca_01125	AT1G15750	7	INTEGRATORS + MAIN TARGETS	TPL,WSIP1	TPLa
Ca_02899	AT1G15750	7	INTEGRATORS + MAIN TARGETS	TPL,WSIP1	TPLb
Ca_02979	AT1G15750	7	INTEGRATORS + MAIN TARGETS	TPL,WSIP1	TPLc
Ca_03648	AT1G15750	7	INTEGRATORS + MAIN TARGETS	TPL,WSIP1	TPLd
Ca_06691	AT1G15750	7	INTEGRATORS + MAIN TARGETS	TPL,WSIP1	TPLe
Ca_14764	AT1G15750	7	INTEGRATORS + MAIN TARGETS	TPL,WSIP1	TPLf
Ca_19166	AT1G15750	7	INTEGRATORS + MAIN TARGETS	TPL,WSIP1	TPLg
Ca_00979	AT3G43190	7	SUGAR	ATSUS4,SUS4	SUS4a
Ca_03118	AT3G43190	7	SUGAR	ATSUS4,SUS4	SUS4b
Ca_03475	AT3G43190	7	SUGAR	ATSUS4,SUS4	SUS4c
Ca_13260	AT3G43190	7	SUGAR	ATSUS4,SUS4	SUS4d
Ca_14391	AT3G43190	7	SUGAR	ATSUS4,SUS4	SUS4e
Ca_18036	AT3G43190	7	SUGAR	ATSUS4,SUS4	SUS4f
Ca_18331	AT3G43190	7	SUGAR	ATSUS4,SUS4	SUS4g
Ca_03371	AT1G50700	8	PHOTOPERIOD + CIRCADIAN CLOCK	CPK33	CPK33a
Ca_04262	AT1G50700	8	PHOTOPERIOD + CIRCADIAN CLOCK	CPK33	CPK33b
Ca_05795	AT1G50700	8	PHOTOPERIOD + CIRCADIAN CLOCK	CPK33	CPK33c
Ca_09836	AT1G50700	8	PHOTOPERIOD + CIRCADIAN CLOCK	CPK33	CPK33d
Ca_14475	AT1G50700	8	PHOTOPERIOD + CIRCADIAN CLOCK	CPK33	CPK33e
Ca_15326	AT1G50700	8	PHOTOPERIOD + CIRCADIAN CLOCK	CPK33	CPK33f
Ca_16911	AT1G50700	8	PHOTOPERIOD + CIRCADIAN CLOCK	CPK33	CPK33g
Ca_21148	AT1G50700	8	PHOTOPERIOD + CIRCADIAN CLOCK	CPK33	CPK33h
Ca_04312	AT2G17290	9	PHOTOPERIOD + CIRCADIAN CLOCK	ATCDPK3,ATCPK6,CPK6	CPK6a
Ca_07256	AT2G17290	9	PHOTOPERIOD + CIRCADIAN CLOCK	ATCDPK3,ATCPK6,CPK6	CPK6b
Ca_10191	AT2G17290	9	PHOTOPERIOD + CIRCADIAN CLOCK	ATCDPK3,ATCPK6,CPK6	CPK6c
Ca_15013	AT2G17290	9	PHOTOPERIOD + CIRCADIAN CLOCK	ATCDPK3,ATCPK6,CPK6	CPK6d
Ca_16891	AT2G17290	9	PHOTOPERIOD + CIRCADIAN CLOCK	ATCDPK3,ATCPK6,CPK6	CPK6e
Ca_20764	AT2G17290	9	PHOTOPERIOD + CIRCADIAN CLOCK	ATCDPK3,ATCPK6,CPK6	CPK6f
Ca_22199	AT2G17290	9	PHOTOPERIOD + CIRCADIAN CLOCK	ATCDPK3,ATCPK6,CPK6	CPK6g
Ca_22267	AT2G17290	9	PHOTOPERIOD + CIRCADIAN CLOCK	ATCDPK3,ATCPK6,CPK6	CPK6h
Ca_22312	AT2G17290	9	PHOTOPERIOD + CIRCADIAN CLOCK	ATCDPK3,ATCPK6,CPK6	CPK6i
Ca_00020	AT5G06850	14	DEVELOPMENT	FTIP1	FTIP1a
Ca_02427	AT5G06850	14	DEVELOPMENT	FTIP1	FTIP1b
Ca_06223	AT5G06850	14	DEVELOPMENT	FTIP1	FTIP1c
Ca_07293	AT5G06850	14	DEVELOPMENT	FTIP1	FTIP1d
Ca_09766	AT5G06850	14	DEVELOPMENT	FTIP1	FTIP1e
Ca_13773	AT5G06850	14	DEVELOPMENT	FTIP1	FTIP1f
Ca_14211	AT5G06850	14	DEVELOPMENT	FTIP1	FTIP1g
Ca_14215	AT5G06850	14	DEVELOPMENT	FTIP1	FTIP1h
Ca_15338	AT5G06850	14	DEVELOPMENT	FTIP1	FTIP1i
Ca_15928	AT5G06850	14	DEVELOPMENT	FTIP1	FTIP1j
Ca_19710	AT5G06850	14	DEVELOPMENT	FTIP1	FTIP1k
Ca_20939	AT5G06850	14	DEVELOPMENT	FTIP1	FTIP1l
Ca_26431	AT5G06850	14	DEVELOPMENT	FTIP1	FTIP1m
Ca_27227	AT5G06850	14	DEVELOPMENT	FTIP1	FTIP1n
