# Supplementary material for: Transcriptomic Analysis of Flowering Time Genes in Cultivated Chickpea and Wild Cicer
Source: Int J Mol Sci. 2023 Jan 31;24(3):2692. doi: 10.3390/ijms24032692 (PMC9916832; doi:10.3390/ijms24032692)
Supplement: Supplementary file 1 [file ijms-24-02692-s001.zip › Supplementary Table S3.xlsx]

## Sheet: before_vs_after
Supplementary Table 3. Differential gene expression between tissue types: leaves BF vs leaves AF
1	CA_ID	name	pathway	arietinum vern-	arietinum vern+	mutant vern-	mutant vern+	reticulatum vern+	echinospermum vern+
2	Ca_00020	FTIP1	DEVELOPMENT	-	-	-	-	NA	-1.67
3	Ca_00497	ATGA2OX2,GA2OX2	HORMONE	3.5	-	3.44	-	-	-
4	Ca_00979	ATSUS4,SUS4	SUGAR	-	1.17	-	-	-	1.62
5	Ca_01365	LHY,LHY1	PHOTOPERIOD + CIRCADIAN CLOCK	-	2.25	-3.34	-	-	-4.67
6	Ca_01394	ICE1	VERNALIZATION + TEMPERATURE	-	-	-	-	-	-1.36
7	Ca_01826	ATPRMT5,PRMT5,SKB1	AUTONOMOUS	-1.54	-2.34	-	-	-1.05	-
8	Ca_02432	ATECS1,AtGSH1,CAD2,GSH1,GSHA,PAD2,RML1	AUTONOMOUS	-4.07	-	-	-	-2.83	-
9	Ca_02845	ATGA3OX1,GA3OX1,GA4	HORMONE	-	-	-	-	-1.82	-
10	Ca_03533	ATGA2OX4,ATGA2OX6,DTA1,GA2OX6	HORMONE	-	-	-	-	-	-3.75
11	Ca_03648	TPL,WSIP1,TPL,WSIP1,TPL,WSIP1	INTEGRATORS + MAIN TARGETS	-	-	-	-	-	1.01
12	Ca_04056	APRR5,PRR5	PHOTOPERIOD + CIRCADIAN CLOCK	1.41	-	-	-	-	4.25
13	Ca_04212	MB2780, EMBRYO DEFECTIVE 2780, GIGANTEA SUPPRESSOR5, GIS5	AUTONOMOUS	-	-1.83	-	-	-1.09	-1.1
14	Ca_04262	CPK33	PHOTOPERIOD + CIRCADIAN CLOCK	-	-	-	-	-	-1.13
15	Ca_04312	ATCDPK3,ATCPK6,CPK6	PHOTOPERIOD + CIRCADIAN CLOCK	-	1.28	-	-	-	-
16	Ca_04321	ATSUC9,SUC9	SUGAR	-	1.83	-	-	-	1.53
17	Ca_04359	FB,GI	PHOTOPERIOD + CIRCADIAN CLOCK	-	-	-	-	-	3.37
18	Ca_04521	AT2353,ATGA20OX2,GA20OX2	HORMONE	-	1.92	-	-	-	-
19	Ca_04778	CIB1	PHOTOPERIOD + CIRCADIAN CLOCK	-	-	-	-	-	1.84
20	Ca_04935	ADG1,APS1	SUGAR	-	-	-	-	-	-1.44
21	Ca_04964	AFR2	PHOTOPERIOD + CIRCADIAN CLOCK	-1.15	-	-	-	-	-1.27
22	Ca_06223	FTIP1	DEVELOPMENT	1.55	1.93	-	-	-	-
23	Ca_06280	AGL6,RSB1	DEVELOPMENT	-	-	-	-	-	-3.29
24	Ca_06865	SPA4; SPA3	PHOTOPERIOD + CIRCADIAN CLOCK	-	-	-	-	-	-1.09
25	Ca_07256	ATCDPK3,ATCPK6,CPK6	PHOTOPERIOD + CIRCADIAN CLOCK	-	-	-	-	-1.32	-
26	Ca_07641	BBX7,COL9	PHOTOPERIOD + CIRCADIAN CLOCK	2.58	2.42	-	-	2.32	4.39
27	Ca_07792	HTA11	AUTONOMOUS	-1.9	-3.47	-	-	-1.9	-3.26
28	Ca_08305	ATGID1B, GID1B	HORMONE	-	1.56	-	-	-	-
29	Ca_08642	ATTPS1,TPS1	SUGAR	-	-2.19	-	-	-	-
30	Ca_09180	ATH1	DEVELOPMENT	-	-1.43	-	-	-	-2.69
31	Ca_09295	AP2,AtAP2,FL1,FLO2	INTEGRATORS + MAIN TARGETS	-	-	1.08	-	-	-
32	Ca_09721	NUCLEAR FACTOR Y, SUBUNIT B3", NF-YB3	PHOTOPERIOD + CIRCADIAN CLOCK	-	-	-	-	-	-1.17
33	Ca_09815	ORTH2,VIM1; ORTH1,VIM3; ORTH5,VIM2	AUTONOMOUS	-	-2.43	-	-	-	-
34	Ca_10135	ATHXK1,GIN2,HXK1	SUGAR	-	-1.49	-	-	-1.29	-1.88
35	Ca_10139	ELF7	AUTONOMOUS	-	-	-	-	-	1.06
36	Ca_10410	ADO3, FKF1	PHOTOPERIOD + CIRCADIAN CLOCK	-	1.75	-	-	1.87	5.31
37	Ca_10518	ATMYB30,MYB30	AUTONOMOUS	-	1.32	-	-	-	-
38	Ca_10686	JMJ32, JUMONJI 32	AUTONOMOUS	-	-1.02	-	-	-	-
39	Ca_12381	AGL7,AP1,AtAP1	INTEGRATORS + MAIN TARGETS	-1.38	-1.39	-	-	-2.25	-1.49
40	Ca_12416	AGL22,FAQ1,SVP	INTEGRATORS + MAIN TARGETS	1.09	1.48	-	-	1.07	-
41	Ca_12986	VIL1,VRN5	VERNALIZATION + TEMPERATURE	-	-	-	-	-	-1.64
42	Ca_13165	APRR1,AtTOC1,PRR1,TOC1	PHOTOPERIOD + CIRCADIAN CLOCK	1.58	1.25	-	-	1.49	3.21
43	Ca_13416	ELF4	PHOTOPERIOD + CIRCADIAN CLOCK	2.18	3.43	-	-	2.41	3.09
44	Ca_13690	BBX24,STO	PHOTOPERIOD + CIRCADIAN CLOCK	-	-	-	-	-1.01	-
45	Ca_14618	RAP2.7,TOE1	DEVELOPMENT	-	-	-	-	-	1.06
46	Ca_15207	ATJ,ATJ3,J3	DEVELOPMENT	-	-	-	-	-	-1.15
47	Ca_15371	ATGRP7,CCR2,GR-RBP7,GRP7	AUTONOMOUS	-	1.49	-	-	-	3.58
48	Ca_15574	ATHAP2A,AtNFYA1,EMB2220,HAP2A,NF-YA1,NFYA1	PHOTOPERIOD + CIRCADIAN CLOCK	-	-	-	-	-1.08	-1.25
49	Ca_16243	SPL5	DEVELOPMENT	-2.11	-	-	-	-2.21	-
50	Ca_16282	LUX,PCL1	PHOTOPERIOD + CIRCADIAN CLOCK	1.32	1.41	-	-	1.41	2.9
51	Ca_16660	CHC1	AUTONOMOUS	-	-	-	-	-	-1.35
52	Ca_17820	ATCOP1,COP1,DET340,EMB168,FUS1	PHOTOPERIOD + CIRCADIAN CLOCK	-	-	-	-	-	-1.24
53	Ca_17996	FY	AUTONOMOUS	-	-1.35	-	-	-	-
54	Ca_18036	ATSUS4,SUS4	SUGAR	1.24	-	-	-	-	-
55	Ca_18331	ATSUS4,SUS4	SUGAR	1.81	1.09	-	-	-	-
56	Ca_18903	JMJ30,JMJD5	PHOTOPERIOD + CIRCADIAN CLOCK	-	1.44	-	-	2.03	2.99
57	Ca_19710	FTIP1	DEVELOPMENT	-	-	-	-	-1.04	-1.45
58	Ca_21260	SPA1	PHOTOPERIOD + CIRCADIAN CLOCK	1.59	-	2.34	-	1.35	3.38
59	Ca_22312	ATCDPK3,ATCPK6,CPK6	PHOTOPERIOD + CIRCADIAN CLOCK	1.19	-	-	-	-	-
60	Ca_22383	CDF2	PHOTOPERIOD + CIRCADIAN CLOCK	-	1.57	-2.45	-	-	-3.31
61	Ca_23164	AT-PHH1,ATCRY2,CRY2,FHA,PHH1	PHOTOPERIOD + CIRCADIAN CLOCK	-	-	-	-	-	1.03
62	Ca_23529	ATKS,ATKS1,GA2,KS,KS1	HORMONE	-	-	-	-	-	-1.56
63	Ca_24123	ATTEM1, EDF1, ETHYLENE RESPONSE DNA BINDING FACTOR 1, TEM1, TEMPRANILLO 1	DEVELOPMENT	-	1.73	-	-	-	-
64	Ca_24925	AGL15	PHOTOPERIOD + CIRCADIAN CLOCK	-	-2.11	-	-	-	-4.42
65	Ca_25805	GA5, GA20OX1, AT2301, ATGA20OX1	HORMONE	2.33	-	-	-	-	2
66	Ca_25929	CDF3	PHOTOPERIOD + CIRCADIAN CLOCK	-	-	-	-	-	-2.17
	Ca_TFL1c2	TFL1c2	DEVELOPMENT	-	1.26	-	-	-	-
