# Supplementary material for: Transcriptomic Analysis of Flowering Time Genes in Cultivated Chickpea and Wild Cicer
Source: Int J Mol Sci. 2023 Jan 31;24(3):2692. doi: 10.3390/ijms24032692 (PMC9916832; doi:10.3390/ijms24032692)
Supplement: Supplementary file 1 [file ijms-24-02692-s001.zip › Supplementary Table S4.xlsx]

## Sheet: after_vs_buds
Supplementary Table 4. Differential gene expression between tissue types: leaves AF vs buds
	CA_ID	name	pathway	arietinum vern-	arietinum vern+	mutant vern-	mutant vern+	reticulatum vern+	echinospermum vern+
1	Ca_00020	FTIP1	DEVELOPMENT	-1.93	-	-2.64	-	-2.87	-
2	Ca_00127	LNK1	PHOTOPERIOD + CIRCADIAN CLOCK	1.57	-	2.32	2.41	1.86	-
3	Ca_00392	CDF4	PHOTOPERIOD + CIRCADIAN CLOCK	-	-	-	-	-	1.64
4	Ca_00497	ATGA2OX2,GA2OX2	HORMONE	-3.22	-	-2.59	-	-2.21	-2.18
5	Ca_00979	ATSUS4,SUS4	SUGAR	-1.4	-1.24	-	-	-	-2.09
6	Ca_01069	FHY2,FRE1,HY8,PHYA	PHOTOPERIOD + CIRCADIAN CLOCK	-	-	1.68	1.64	1.73	1.03
7	Ca_01175	HAP5C,NF-YC9	PHOTOPERIOD + CIRCADIAN CLOCK	-1.05	-1.08	-1.35	-1.01	-1.44	-
8	Ca_01365	LHY,LHY1	PHOTOPERIOD + CIRCADIAN CLOCK	1.85	-	2.59	2.86	1.75	2.15
9	Ca_01386	LFY,LFY3	DEVELOPMENT	-3.08	-2.73	-3.6	-3.66	-2.1	-2.54
10	Ca_01394	ICE1	VERNALIZATION + TEMPERATURE	-1.24	-1.13	-1.02	-	-2.33	-1.89
11	Ca_01677	ATDCL4,DCL4; ATDCL3,DCL3; ASU1,ATDCL1,CAF,DCL1,EMB60,EMB76,SIN1,SUS1	AUTONOMOUS	-	-1.02	-	-	-	-1.23
12	Ca_01826	ATPRMT5,PRMT5,SKB1	AUTONOMOUS	-	-	-3.48	-2.94	-1.45	-
13	Ca_02166	CLF,ICU1,SDG1,SET1	INTEGRATORS + MAIN TARGETS	-	-	-	-1.25	-	-
14	Ca_02427	FTIP1	DEVELOPMENT	-3.3	-3.31	-4.52	-4.93	-3.47	-4.06
15	Ca_02432	ATECS1,AtGSH1,CAD2,GSH1,GSHA,PAD2,RML1	AUTONOMOUS	2.93	-	2.31	-	2.8	3.87
16	Ca_02452	ATGLK1,GLK1,GPRI1	AUTONOMOUS	3.35	3.57	4.99	5.58	4.32	2.97
17	Ca_02746	ACG1,ATMSI4,FVE,MSI4,NFC04,NFC4	AUTONOMOUS	-1.83	-1.48	-2.51	-2.48	-2.53	-2.16
18	Ca_02899	TPL,WSIP1,TPL,WSIP1,TPL,WSIP1	INTEGRATORS + MAIN TARGETS	-	-1	-	-1.05	-	-
19	Ca_03051	ATGA2OX4,GA2OX4	HORMONE	-4.07	-3.97	-3.1	-3.91	-3.26	-3.06
20	Ca_03238	VEL1,VIL2	VERNALIZATION + TEMPERATURE	-	1.16	1.55	1.72	1.35	1.33
21	Ca_03275	ATCOL5,BBX6,COL5	PHOTOPERIOD + CIRCADIAN CLOCK	1.38	1.59	1.89	2.28	1.91	1.72
22	Ca_03357	ADG1,APS1	SUGAR	4.13	3.88	4.73	4.54	3.99	4.27
23	Ca_03371	CPK33	PHOTOPERIOD + CIRCADIAN CLOCK	-	-	-	-	-	1.13
24	Ca_03475	ATSUS4,SUS4	SUGAR	-5.14	-4.53	-2.28	-	-8.52	-
25	Ca_03582	PHYA, FHY2, FRE1, HY8	PHOTOPERIOD + CIRCADIAN CLOCK	1.43	1.5	1.43	1.18	1.47	1.54
26	Ca_04212	MB2780, EMBRYO DEFECTIVE 2780, GIGANTEA SUPPRESSOR5, GIS5	AUTONOMOUS	-1.86	-1.13	-2.73	-2.17	-1.63	-1.47
27	Ca_04262	CPK33	PHOTOPERIOD + CIRCADIAN CLOCK	-	-	-1.3	-1.55	-1.02	-
28	Ca_04312	ATCDPK3,ATCPK6,CPK6	PHOTOPERIOD + CIRCADIAN CLOCK	1.01	-	2.01	1.8	-	1.22
29	Ca_04321	ATSUC9,SUC9	SUGAR	-	-	2.77	2.81	1.85	-
30	Ca_04520	ATPGMP,PGM,PGM1,STF1	SUGAR	2.22	2.06	2.46	2.29	2.05	1.7
31	Ca_04521	AT2353,ATGA20OX2,GA20OX2	HORMONE	-3.35	-3.11	-2.93	-	-2.3	-
32	Ca_04778	CIB1	PHOTOPERIOD + CIRCADIAN CLOCK	-	-	1.16	-	1.37	-
33	Ca_04935	ADG1,APS1	SUGAR	-1.59	-2.01	-2.04	-2.07	-1.29	-2.26
34	Ca_04964	AFR2	PHOTOPERIOD + CIRCADIAN CLOCK	-	-	-1.45	-1.54	-1.12	-
35	Ca_05144	ATMSI1,MEE70,MSI1	INTEGRATORS + MAIN TARGETS	-	-	-1.15	-1.04	-	-
36	Ca_05924	ATHXK1,GIN2,HXK1	SUGAR	-	-	-	-	-	1.22
37	Ca_06223	FTIP1	DEVELOPMENT	-1.62	-3.03	-	-	-	-2.22
38	Ca_06280	AGL6,RSB1	DEVELOPMENT	-5.95	-5.32	-4.63	-5.88	-8.77	-4.57
39	Ca_06627	EARLY FLOWERING MYB PROTEIN, EFM, HHO4, HRS1 HOMOLOG4	VERNALIZATION + TEMPERATURE	1.3	-	-	1.11	1.18	-
40	Ca_06691	TPL,WSIP1,TPL,WSIP1,TPL,WSIP1	INTEGRATORS + MAIN TARGETS	-	-	-	-	-1.17	-
41	Ca_06865	SPA4; SPA3	PHOTOPERIOD + CIRCADIAN CLOCK	1.13	1.15	2.09	1.98	1.68	1.71
42	Ca_07058	MYR2	PHOTOPERIOD + CIRCADIAN CLOCK	1.92	1.72	2.98	2.8	2.93	1.6
43	Ca_07256	ATCDPK3,ATCPK6,CPK6	PHOTOPERIOD + CIRCADIAN CLOCK	-	-	1.87	-	2.26	1.77
44	Ca_07341	ATGID1B,GID1B	HORMONE	1.49	-	2.06	-	1.44	1.69
45	Ca_07381	ABC33,ATCPS1,CPS,CPS1,GA1	HORMONE	2.63	2.5	2.59	2.29	1.93	3.17
46	Ca_07461	ATHDA6,AXE1,HDA6,RPD3B,RTS1,SIL1	AUTONOMOUS	-1.23	-1.3	-1.54	-	-2.38	-1.56
47	Ca_07632	ADG1,APS1	SUGAR	2.11	2.14	2.08	2.13	2.14	2.37
48	Ca_07792	HTA11	AUTONOMOUS	-1.83	-	-4.36	-3.58	-2.84	-
49	Ca_07860	ATHAP3,ATNF-YB1,HAP3,HAP3A,NF-YB1	PHOTOPERIOD + CIRCADIAN CLOCK	-	-	-1.09	-	-1.83	-1.03
50	Ca_08206	RRP6L1, RRP6L2	AUTONOMOUS	-	-	-1.2	-1.25	-1.04	-
51	Ca_08305	ATGID1B, GID1B	HORMONE	-	-1.5	-	-	-	-1.75
52	Ca_08335	AtEMF2,CYR1,EMF2,VEF2	INTEGRATORS + MAIN TARGETS	-	-	-1.14	-1.03	-	-
53	Ca_08642	ATTPS1,TPS1	SUGAR	-4.21	-2.76	-4.44	-3.07	-6.48	-4.57
54	Ca_09180	ATH1	DEVELOPMENT	-	-	-1.8	-	-2.07	-
55	Ca_09721	NUCLEAR FACTOR Y, SUBUNIT B3", NF-YB3	PHOTOPERIOD + CIRCADIAN CLOCK	1.35	1.35	1.79	1.21	-	1.3
56	Ca_09767	ADG1,APS1	SUGAR	1.33	1.3	1.06	1.1	1.05	1.48
57	Ca_09815	ORTH2,VIM1; ORTH1,VIM3; ORTH5,VIM2	AUTONOMOUS	-3.04	-2.23	-4.04	-4.03	-2.99	-2.92
58	Ca_10135	ATHXK1,GIN2,HXK1	SUGAR	-1.55	-1.49	-2.92	-2.42	-2.01	-
59	Ca_10191	ATCDPK3,ATCPK6,CPK6	PHOTOPERIOD + CIRCADIAN CLOCK	1.93	1.65	2.58	-	1.9	2.7
60	Ca_10410	ADO3, FKF1	PHOTOPERIOD + CIRCADIAN CLOCK	-	-	-	-	-	-2.51
61	Ca_10518	ATMYB30,MYB30	AUTONOMOUS	-	-	1.59	1.36	-	-
62	Ca_10804	ATHMG,HMG,NFD,SSRP1	VERNALIZATION + TEMPERATURE	-	-1.09	-1.89	-1.54	-1.85	-1.89
63	Ca_10955	ATPRMT5,PRMT5,SKB1	AUTONOMOUS	-	-	-	-	-	-1.32
64	Ca_10963	ATUBP26,SUP32,UBP26	AUTONOMOUS	-1.32	-1.38	-	-	-1.96	-2.61
65	Ca_12132	CRY2, FHA, AT-PHH1, PHH1, ATCRY2	PHOTOPERIOD + CIRCADIAN CLOCK	-	-	1.45	1.46	1.17	-
66	Ca_12282	VIP5	VERNALIZATION + TEMPERATURE	-1.23	-1.52	-1.17	-	-	-1.46
67	Ca_12381	AGL7,AP1,AtAP1	INTEGRATORS + MAIN TARGETS	-7.12	-6.95	-7.31	-7.53	-7.16	-7.18
68	Ca_12416	AGL22,FAQ1,SVP	INTEGRATORS + MAIN TARGETS	-	-1.37	-	-	-	1.8
69	Ca_12942	ATTPS1,TPS1	SUGAR	-	-	-	-1.26	-	-
70	Ca_12986	VIL1,VRN5	VERNALIZATION + TEMPERATURE	-	-	-	-	-	1.14
71	Ca_12996	LDL2; FLD; ATLSD1,ATSWP1,LDL1,LSD1,SWP1	AUTONOMOUS	-	-	-	-	-1.43	-1.3
72	Ca_13260	ATSUS4,SUS4	SUGAR	1.62	1.72	1.95	-	2.12	1.6
73	Ca_13671	REM39,VRN1	VERNALIZATION + TEMPERATURE	-1.53	-1.66	-2.65	-2.67	-2.2	-1.79
74	Ca_13690	BBX24,STO	PHOTOPERIOD + CIRCADIAN CLOCK	-	-	-	-	1.02	1.1
75	Ca_14211	FTIP1	DEVELOPMENT	-1.86	-1.58	-2.65	-2.31	-1.86	-1.26
76	Ca_14215	FTIP1	DEVELOPMENT	1.76	1.12	2.46	1.7	2.39	1.31
77	Ca_14223	AKS3,FBH4	PHOTOPERIOD + CIRCADIAN CLOCK	1.44	1.45	2	-	2.69	1.57
78	Ca_14391	ATSUS4,SUS4	SUGAR	1.6	1.58	1.82	-	2.42	-
79	Ca_14475	CPK33	PHOTOPERIOD + CIRCADIAN CLOCK	-1.17	-	-1.33	-	-1.19	-
80	Ca_14563	ABA OVERLY SENSITIVE 4, ABO4, EARLY IN SHORT DAYS 7, EMB142, EMB2284, EMB529, EMBRYO DEFECTIVE 142, EMBRYO DEFECTIVE 2284, EMBRYO DEFECTIVE 529, ESD7, POL2A, TIL1, TILTED 1	AUTONOMOUS	-1.53	-1.05	-1.95	-1.91	-1.61	-1.44
81	Ca_14618	RAP2.7,TOE1	DEVELOPMENT	2.71	1.88	1.76	2.09	1.65	1.01
82	Ca_14997	PGI,PGI1	SUGAR	1.28	1.21	1.5	1.14	1.28	1.69
83	Ca_15013	ATCDPK3,ATCPK6,CPK6	PHOTOPERIOD + CIRCADIAN CLOCK	-	-	-1.16	-1.25	-	-
84	Ca_15024	SPA1	PHOTOPERIOD + CIRCADIAN CLOCK	-	-	1.36	1.3	1.36	1.16
85	Ca_15058	ATDET1,DET1,FUS2	PHOTOPERIOD + CIRCADIAN CLOCK	-	1.03	1.13	1.47	-	-
86	Ca_15371	ATGRP7,CCR2,GR-RBP7,GRP7	AUTONOMOUS	-	-	-	-	-	-1.49
87	Ca_15574	ATHAP2A,AtNFYA1,EMB2220,HAP2A,NF-YA1,NFYA1	PHOTOPERIOD + CIRCADIAN CLOCK	1.03	-	1.33	-	-	-
88	Ca_15928	FTIP1	DEVELOPMENT	1.46	1.55	-	-	1.51	-
89	Ca_16024	SUVR5	AUTONOMOUS	-2.78	-2.18	-2.87	-	-3.13	-3.9
90	Ca_16230	EBS	PHOTOPERIOD + CIRCADIAN CLOCK	-	-	-1.02	-	-	-
91	Ca_16243	SPL5	DEVELOPMENT	-	-2.8	-	-2.45	-	-3.99
92	Ca_16660	CHC1	AUTONOMOUS	-1.7	-1.72	-1.87	-1.77	-	-
93	Ca_16748	JMJ14,PKDM7B; JMJ15,MEE27,PKDM7C	AUTONOMOUS	-	-	1.05	-	1.36	1.36
94	Ca_17515	GAS41,TAF14B,YAF9a	VERNALIZATION + TEMPERATURE	-	-	-	-	-	1.1
95	Ca_17781	LRB2, POB1	VERNALIZATION + TEMPERATURE	-	-	-	-	-	-1.08
96	Ca_17861	ATHXK1,GIN2,HXK1	SUGAR	-	-	-	-1.06	-	-
97	Ca_17996	FY	AUTONOMOUS	-	-	-1.74	-1.27	-	-
98	Ca_18036	ATSUS4,SUS4	SUGAR	-	-	-1.18	-	-1.3	-
99	Ca_18331	ATSUS4,SUS4	SUGAR	-2.79	-2.24	-1.53	-	-1.68	-1.57
100	Ca_19014	ULT,ULT1	INTEGRATORS + MAIN TARGETS	-	-	-	-	-	1.48
101	Ca_19592	AHL22	PHOTOPERIOD + CIRCADIAN CLOCK	-5.16	-5.81	-7.38	-	-7.07	-3.68
102	Ca_19710	FTIP1	DEVELOPMENT	-1.16	-1.96	-1.15	-	-1.96	-3.26
103	Ca_19775	BFT	DEVELOPMENT	-	-	-4.8	-	-	-
104	Ca_19854	AGL18	PHOTOPERIOD + CIRCADIAN CLOCK	-3.52	-3.08	-3.79	-3.5	-3.96	-2.86
105	Ca_20764	ATCDPK3,ATCPK6,CPK6	PHOTOPERIOD + CIRCADIAN CLOCK	1.55	1.51	2.1	-	1.81	1.66
106	Ca_20931	RRP6L2	AUTONOMOUS	-	-	-1.12	-	-	-
107	Ca_20939	FTIP1	DEVELOPMENT	-	-1.01	-	-	-	-
108	Ca_21576	ATPIF4, PHYTOCHROME INTERACTING FACTOR 4, PIF4, SRL2_x000D_	PHOTOPERIOD + CIRCADIAN CLOCK	2.97	3.64	4.75	4.62	4.55	3.43
109	Ca_22267	ATCDPK3,ATCPK6,CPK6	PHOTOPERIOD + CIRCADIAN CLOCK	-1.37	-1.31	-	-	-1.82	-2.39
110	Ca_22383	CDF2	PHOTOPERIOD + CIRCADIAN CLOCK	-	-1.43	-	-	-	-
111	Ca_23164	AT-PHH1,ATCRY2,CRY2,FHA,PHH1	PHOTOPERIOD + CIRCADIAN CLOCK	-	-	-	1.24	-	1.32
112	Ca_23533	APL,WDY	PHOTOPERIOD + CIRCADIAN CLOCK	2.17	-	2.05	1.51	2.21	1.26
113	Ca_23894	ABH1,ATCBP80,CBP80,ENS	AUTONOMOUS	-	-	-1.51	-1.58	-	-
114	Ca_24123	ATTEM1, EDF1, ETHYLENE RESPONSE DNA BINDING FACTOR 1, TEM1, TEMPRANILLO 1	DEVELOPMENT	-	-	3.06	2.5	1.31	-
115	Ca_24787	SENSITIVITY TO RED LIGHT REDUCED 1, SRR1_x000D_	PHOTOPERIOD + CIRCADIAN CLOCK	-	-	-	-	-	1.13
116	Ca_24925	AGL15	PHOTOPERIOD + CIRCADIAN CLOCK	-	-	-2.56	-	-2.69	-
117	Ca_25805	GA5, GA20OX1, AT2301, ATGA20OX1	HORMONE	-	-	2.27	-	1.39	-
118	Ca_25923	CRY1, BLU1, HY4, OOP2, ATCRY1	PHOTOPERIOD + CIRCADIAN CLOCK	1.26	1.76	2.28	2.45	1.95	1.74
119	Ca_25929	CDF3	PHOTOPERIOD + CIRCADIAN CLOCK	1.39	1.43	2.31	2.89	1.48	1.4
120	Ca_26523	ATPRMT10,PRMT10	AUTONOMOUS	-	-	-1.19	-	-1.08	-
121	Ca_26853	ATTPS1,TPS1	SUGAR	1.29	1.4	1.71	1.85	2.95	2.5
122	Ca_27098	ATSUC9,SUC9	SUGAR	-5.28	-5.1	-	-3.15	-4.69	-
123	Ca_27247	VIP5	VERNALIZATION + TEMPERATURE	-7.39	-6.64	-5.06	-6.01	-5.61	-
124	Ca_27770	LNK2	PHOTOPERIOD + CIRCADIAN CLOCK	1.47	1.41	2.12	2.04	1.73	1.09
125	Ca_FTa1	FTa1	DEVELOPMENT	-	-	-	2.61	-	-
126	Ca_TFL1c2	TFL1c2	DEVELOPMENT	-	-2.48	-2.75	-3.82	-3.17	-3.82
127	Ca_TFL1c3	TFL1c3	DEVELOPMENT	-	-2.93	-	-5.37	-3.59	-
