# Supplementary material for: Transcriptomic Analysis of Flowering Time Genes in Cultivated Chickpea and Wild Cicer
Source: Int J Mol Sci. 2023 Jan 31;24(3):2692. doi: 10.3390/ijms24032692 (PMC9916832; doi:10.3390/ijms24032692)
Supplement: Supplementary file 1 [file ijms-24-02692-s001.zip › Supplementary Table S5.xlsx]

## Sheet: before_vs_buds
Supplementary Table 5. Differential gene expression between tissue types: leaves BF vs buds
	CA_ID	name	pathway	arietinum vern-	arietinum vern+	mutant vern-	mutant vern+	reticulatum vern+	echinospermum vern+
1	Ca_00020	FTIP1	DEVELOPMENT	-	-2.22	-	-	-3.76	-
2	Ca_00127	LNK1	PHOTOPERIOD + CIRCADIAN CLOCK	1.45	1.96	-	2.67	-	-
3	Ca_00392	CDF4	PHOTOPERIOD + CIRCADIAN CLOCK	1.43	-	-	-	-	-
4	Ca_00497	ATGA2OX2,GA2OX2	HORMONE	-	-	-	-	-1.73	-
5	Ca_01069	FHY2,FRE1,HY8,PHYA	PHOTOPERIOD + CIRCADIAN CLOCK	-	1.57	1.14	1.82	1.78	1.43
6	Ca_01175	HAP5C,NF-YC9	PHOTOPERIOD + CIRCADIAN CLOCK	-1.46	-1.32	-1.09	-1.03	-1.6	-1.17
7	Ca_01365	LHY,LHY1	PHOTOPERIOD + CIRCADIAN CLOCK	1.7	2.99	-	3.16	-	-2.52
8	Ca_01386	LFY,LFY3	DEVELOPMENT	-2.55	-2	-2.69	-2.43	-2.34	-2.51
9	Ca_01394	ICE1	VERNALIZATION + TEMPERATURE	-1.35	-1.28	-1.4	-	-2.9	-3.25
10	Ca_01677	ATDCL4,DCL4; ATDCL3,DCL3; ASU1,ATDCL1,CAF,DCL1,EMB60,EMB76,SIN1,SUS1	AUTONOMOUS	-1.11	-	-1.01	-	-	-
11	Ca_01826	ATPRMT5,PRMT5,SKB1	AUTONOMOUS	-2.25	-2.58	-3.23	-3.64	-2.49	-1.55
12	Ca_02166	CLF,ICU1,SDG1,SET1	INTEGRATORS + MAIN TARGETS	-	-	-	-1.63	-	-
13	Ca_02330	ESD6,HOS1	PHOTOPERIOD + CIRCADIAN CLOCK	-	-1.06	-	-1.03	-	-
14	Ca_02427	FTIP1	DEVELOPMENT	-3.58	-3.85	-3.97	-4.24	-4.68	-3.43
15	Ca_02450	ATCBP20,CBP20	VERNALIZATION + TEMPERATURE	-	-	-	-1	-	-
16	Ca_02452	ATGLK1,GLK1,GPRI1	AUTONOMOUS	3.23	4.22	4.71	5.58	4.34	2.96
17	Ca_02746	ACG1,ATMSI4,FVE,MSI4,NFC04,NFC4	AUTONOMOUS	-2.32	-2.46	-2.39	-2.78	-2.62	-3.12
18	Ca_02845	ATGA3OX1,GA3OX1,GA4	HORMONE	-	-	-	-	-1.76	-
19	Ca_03051	ATGA2OX4,GA2OX4	HORMONE	-3.82	-3.55	-4.17	-3.58	-3.58	-2.52
20	Ca_03118	ATSUS4,SUS4	SUGAR	-	-	-	-1.35	-	-
21	Ca_03238	VEL1,VIL2	VERNALIZATION + TEMPERATURE	1.81	1.94	2.07	2.11	2.15	2.32
22	Ca_03275	ATCOL5,BBX6,COL5	PHOTOPERIOD + CIRCADIAN CLOCK	1.77	2.08	1.92	2.14	2.34	2.57
23	Ca_03357	ADG1,APS1	SUGAR	4.06	4.07	4.76	4.52	4.2	4.21
24	Ca_03475	ATSUS4,SUS4	SUGAR	-6.53	-6.26	-	-3.06	-8.94	-3
25	Ca_03533	ATGA2OX4,ATGA2OX6,DTA1,GA2OX6	HORMONE	-2.39	-	-	-	-	-
26	Ca_03582	PHYA, FHY2, FRE1, HY8	PHOTOPERIOD + CIRCADIAN CLOCK	1.37	1.47	1.69	1.32	1.55	1.45
27	Ca_04056	APRR5,PRR5	PHOTOPERIOD + CIRCADIAN CLOCK	1.85	2.18	2.66	2.12	1.74	3.21
28	Ca_04212	MB2780, EMBRYO DEFECTIVE 2780, GIGANTEA SUPPRESSOR5, GIS5	AUTONOMOUS	-2.58	-2.96	-3	-2.81	-2.72	-2.56
29	Ca_04262	CPK33	PHOTOPERIOD + CIRCADIAN CLOCK	-	-1.25	-	-2.04	-1.42	-
30	Ca_04312	ATCDPK3,ATCPK6,CPK6	PHOTOPERIOD + CIRCADIAN CLOCK	1.94	1.93	2.49	2.43	-	2.09
31	Ca_04321	ATSUC9,SUC9	SUGAR	1.59	1.88	1.66	2.64	2.54	1.19
32	Ca_04359	FB,GI	PHOTOPERIOD + CIRCADIAN CLOCK	1.09	1.12	1.72	1.51	1.5	2.82
33	Ca_04520	ATPGMP,PGM,PGM1,STF1	SUGAR	2.13	2.23	2.13	2.07	2.28	2
34	Ca_04521	AT2353,ATGA20OX2,GA20OX2	HORMONE	-1.88	-	-2.3	-	-2.08	-
35	Ca_04608	TIC	PHOTOPERIOD + CIRCADIAN CLOCK	-	-	-	1.44	-	-
36	Ca_04778	CIB1	PHOTOPERIOD + CIRCADIAN CLOCK	1.16	1.26	2.07	1.13	2.27	1.78
37	Ca_04935	ADG1,APS1	SUGAR	-2.56	-2.65	-2.24	-2.23	-1.94	-3.71
38	Ca_04964	AFR2	PHOTOPERIOD + CIRCADIAN CLOCK	-1.86	-1.79	-1.14	-2	-1.76	-2.13
39	Ca_05144	ATMSI1,MEE70,MSI1	INTEGRATORS + MAIN TARGETS	-	-1.09	-1.01	-1.42	-	-
40	Ca_06223	FTIP1	DEVELOPMENT	-	-	-	-	-1.41	-1.73
41	Ca_06280	AGL6,RSB1	DEVELOPMENT	-5.81	-5.92	-4.4	-5.7	-10.12	-7.86
42	Ca_06627	EARLY FLOWERING MYB PROTEIN, EFM, HHO4, HRS1 HOMOLOG4	VERNALIZATION + TEMPERATURE	1.13	-	-	-	-	-
43	Ca_06691	TPL,WSIP1,TPL,WSIP1,TPL,WSIP1	INTEGRATORS + MAIN TARGETS	-1	-	-1.16	-	-1.16	-1.81
44	Ca_06865	SPA4; SPA3	PHOTOPERIOD + CIRCADIAN CLOCK	1.37	2.01	1.05	2.03	1.36	-
45	Ca_07058	MYR2	PHOTOPERIOD + CIRCADIAN CLOCK	2.34	2.67	2.58	2.64	2.99	2.39
46	Ca_07256	ATCDPK3,ATCPK6,CPK6	PHOTOPERIOD + CIRCADIAN CLOCK	1.29	1.23	-	-	-	-
47	Ca_07299	AtSPL9,SPL9	DEVELOPMENT	-1.29	-1.27	-	-	-	-
48	Ca_07341	ATGID1B,GID1B	HORMONE	1.08	-	-	2.15	-	-
49	Ca_07381	ABC33,ATCPS1,CPS,CPS1,GA1	HORMONE	2.1	2.03	2.73	2.05	1.88	3.8
50	Ca_07461	ATHDA6,AXE1,HDA6,RPD3B,RTS1,SIL1	AUTONOMOUS	-1.62	-1.6	-1.46	-	-2.68	-1.95
51	Ca_07632	ADG1,APS1	SUGAR	1.86	2.07	2.04	1.88	1.89	1.67
52	Ca_07641	BBX7,COL9	PHOTOPERIOD + CIRCADIAN CLOCK	2.18	2.69	2.48	-	2.52	4.14
53	Ca_07792	HTA11	AUTONOMOUS	-3.73	-4.22	-3.38	-4.85	-4.74	-4.35
54	Ca_07860	ATHAP3,ATNF-YB1,HAP3,HAP3A,NF-YB1	PHOTOPERIOD + CIRCADIAN CLOCK	-1.07	-1.17	-	-	-2.06	-1.38
55	Ca_08206	RRP6L1, RRP6L2	AUTONOMOUS	-	-1.16	-	-1.2	-	-
56	Ca_08305	ATGID1B, GID1B	HORMONE	-	-	-	-	-	-1.53
57	Ca_08335	AtEMF2,CYR1,EMF2,VEF2	INTEGRATORS + MAIN TARGETS	-	-	-	-1.4	-	-
58	Ca_08642	ATTPS1,TPS1	SUGAR	-4.8	-4.95	-2.77	-5.21	-7.15	-6.73
59	Ca_08760	CHC1	AUTONOMOUS	-	-1.1	-1.28	-1.09	-	-
60	Ca_09180	ATH1	DEVELOPMENT	-	-2.13	-	-2.3	-3.58	-2.91
61	Ca_09721	NUCLEAR FACTOR Y, SUBUNIT B3", NF-YB3	PHOTOPERIOD + CIRCADIAN CLOCK	1.24	1.11	1.63	-	-	-
62	Ca_09767	ADG1,APS1	SUGAR	1.25	1.72	1.42	1.34	-	1.32
63	Ca_09815	ORTH2,VIM1; ORTH1,VIM3; ORTH5,VIM2	AUTONOMOUS	-3.87	-4.66	-3.77	-3.71	-3.4	-2.89
64	Ca_10135	ATHXK1,GIN2,HXK1	SUGAR	-2.14	-2.98	-2.39	-4.28	-3.3	-2.2
65	Ca_10191	ATCDPK3,ATCPK6,CPK6	PHOTOPERIOD + CIRCADIAN CLOCK	2.31	2.73	2.97	2.02	1.79	3.37
66	Ca_10410	ADO3, FKF1	PHOTOPERIOD + CIRCADIAN CLOCK	-	-	-	-	-	2.8
67	Ca_10518	ATMYB30,MYB30	AUTONOMOUS	1.01	1.41	1.26	1.85	-	1.46
68	Ca_10686	JMJ32, JUMONJI 32	AUTONOMOUS	-	-	-	-	-1.16	-
69	Ca_10804	ATHMG,HMG,NFD,SSRP1	VERNALIZATION + TEMPERATURE	-1.68	-1.76	-1.82	-1.8	-2.28	-2.05
70	Ca_10955	ATPRMT5,PRMT5,SKB1	AUTONOMOUS	-	-	-	-	-	-1.63
71	Ca_10963	ATUBP26,SUP32,UBP26	AUTONOMOUS	-1.22	-1.25	-	-	-1.89	-2.38
72	Ca_11760	AtLHP1,LHP1,TFL2	DEVELOPMENT	-	-	-	-1.12	-	-
73	Ca_11893	ATGA2OX8,GA2OX8	HORMONE	-1.23	-	-	-	-	-
74	Ca_12132	CRY2, FHA, AT-PHH1, PHH1, ATCRY2	PHOTOPERIOD + CIRCADIAN CLOCK	1.18	1.26	1.68	1.19	1.6	1.26
75	Ca_12282	VIP5	VERNALIZATION + TEMPERATURE	-1.43	-1.77	-	-	-	-1.4
76	Ca_12381	AGL7,AP1,AtAP1	INTEGRATORS + MAIN TARGETS	-8.5	-8.34	-8.07	-9.85	-9.41	-8.68
77	Ca_12416	AGL22,FAQ1,SVP	INTEGRATORS + MAIN TARGETS	-	-	-	-	-	2.65
78	Ca_12996	LDL2; FLD; ATLSD1,ATSWP1,LDL1,LSD1,SWP1	AUTONOMOUS	-	-1.06	-	-	-1.58	-
79	Ca_13165	APRR1,AtTOC1,PRR1,TOC1	PHOTOPERIOD + CIRCADIAN CLOCK	1.64	1.65	1.71	-	2.22	2.82
80	Ca_13260	ATSUS4,SUS4	SUGAR	2.07	1.94	2.52	-	1.84	1.89
81	Ca_13416	ELF4	PHOTOPERIOD + CIRCADIAN CLOCK	2.14	2.5	-	-	2.52	2.89
82	Ca_13671	REM39,VRN1	VERNALIZATION + TEMPERATURE	-2.5	-2.21	-2.09	-2.35	-2.94	-2.65
83	Ca_13690	BBX24,STO	PHOTOPERIOD + CIRCADIAN CLOCK	-	-	-	1.06	-	-
84	Ca_14211	FTIP1	DEVELOPMENT	-1.95	-2.07	-2.06	-2.3	-1.82	-1.66
85	Ca_14215	FTIP1	DEVELOPMENT	2.18	1.99	2.04	1.53	2.5	2.07
86	Ca_14223	AKS3,FBH4	PHOTOPERIOD + CIRCADIAN CLOCK	1.77	2.27	1.76	1.36	3.02	2.28
87	Ca_14391	ATSUS4,SUS4	SUGAR	1.94	1.77	2.08	-	2.22	-
88	Ca_14475	CPK33	PHOTOPERIOD + CIRCADIAN CLOCK	-1.22	-1.51	-	-	-1.47	-1.11
89	Ca_14563	ABA OVERLY SENSITIVE 4, ABO4, EARLY IN SHORT DAYS 7, EMB142, EMB2284, EMB529, EMBRYO DEFECTIVE 142, EMBRYO DEFECTIVE 2284, EMBRYO DEFECTIVE 529, ESD7, POL2A, TIL1, TILTED 1	AUTONOMOUS	-1.81	-1.72	-1.93	-2.14	-2.06	-1.89
90	Ca_14618	RAP2.7,TOE1	DEVELOPMENT	2.58	2.6	1.69	2.08	2.4	2.07
91	Ca_14997	PGI,PGI1	SUGAR	1.47	1.47	1.49	1.27	1.56	1.84
92	Ca_15013	ATCDPK3,ATCPK6,CPK6	PHOTOPERIOD + CIRCADIAN CLOCK	-1.16	-1.44	-	-1.76	-	-
93	Ca_15024	SPA1	PHOTOPERIOD + CIRCADIAN CLOCK	-	1.21	1.12	1.47	1.5	1.04
94	Ca_15058	ATDET1,DET1,FUS2	PHOTOPERIOD + CIRCADIAN CLOCK	1.04	1.04	1	1.44	-	-
95	Ca_15207	ATJ,ATJ3,J3	DEVELOPMENT	-	-	-	-	-	-1.32
96	Ca_15371	ATGRP7,CCR2,GR-RBP7,GRP7	AUTONOMOUS	-	-	-	-	-	2.08
97	Ca_15574	ATHAP2A,AtNFYA1,EMB2220,HAP2A,NF-YA1,NFYA1	PHOTOPERIOD + CIRCADIAN CLOCK	-	-	-	1.09	-	-
98	Ca_15928	FTIP1	DEVELOPMENT	1.27	-	1.75	-	-	-
99	Ca_16024	SUVR5	AUTONOMOUS	-3.56	-2.46	-2.46	-	-4.42	-4.28
100	Ca_16230	EBS	PHOTOPERIOD + CIRCADIAN CLOCK	-	-	-	-1.26	-	-
101	Ca_16243	SPL5	DEVELOPMENT	-2.33	-2.41	-2.74	-	-3.47	-4.35
102	Ca_16282	LUX,PCL1	PHOTOPERIOD + CIRCADIAN CLOCK	1.2	1.22	-	-	1.7	2.15
103	Ca_16660	CHC1	AUTONOMOUS	-1.72	-2.04	-1.49	-1.32	-	-1.59
104	Ca_16689	AtPUB12,PUB12; ATPUB13,PUB13	AUTONOMOUS	-	-	-	-	1.02	1.21
105	Ca_16748	JMJ14,PKDM7B; JMJ15,MEE27,PKDM7C	AUTONOMOUS	-	1.01	1.13	1.14	1.2	1.7
106	Ca_17177	ARP4,ATARP4	AUTONOMOUS	-	-	-	-	-1.14	-
107	Ca_17861	ATHXK1,GIN2,HXK1	SUGAR	-	-	-	-1.08	-	-
108	Ca_17996	FY	AUTONOMOUS	-1.31	-1.4	-1.7	-1.44	-1.47	-1.12
109	Ca_18331	ATSUS4,SUS4	SUGAR	-	-1.15	-2.17	-1.69	-	-
110	Ca_18903	JMJ30,JMJD5	PHOTOPERIOD + CIRCADIAN CLOCK	-	1.34	-	-	1.5	1.91
111	Ca_18949	ATJ,ATJ3,J3	DEVELOPMENT	-	-	-	-	-	-1.25
112	Ca_19014	ULT,ULT1	INTEGRATORS + MAIN TARGETS	-	-	1.24	-	-	1.1
113	Ca_19141	FT,RSB8	DEVELOPMENT	-3.39	-	-	-	-	-
114	Ca_19592	AHL22	PHOTOPERIOD + CIRCADIAN CLOCK	-4.61	-5.27	-7.45	-4.27	-7.49	-5.11
115	Ca_19710	FTIP1	DEVELOPMENT	-1.23	-1.59	-1.04	-	-2.99	-4.71
116	Ca_19775	BFT	DEVELOPMENT	-	-3.5	-	-	-	-
117	Ca_19854	AGL18	PHOTOPERIOD + CIRCADIAN CLOCK	-2.43	-2.5	-2.97	-2.56	-4.42	-3.29
118	Ca_20764	ATCDPK3,ATCPK6,CPK6	PHOTOPERIOD + CIRCADIAN CLOCK	2.19	2.42	2.42	-	1.78	2.11
119	Ca_20931	RRP6L2	AUTONOMOUS	-	-	-1.07	-	-	-
120	Ca_21044	ATSUC9,SUC9	SUGAR	-	-	-	-	-4.31	-
121	Ca_21130	AS1,ATMYB91,ATPHAN,MYB91	PHOTOPERIOD + CIRCADIAN CLOCK	-	-	-	-1.23	-	-
122	Ca_21260	SPA1	PHOTOPERIOD + CIRCADIAN CLOCK	2.46	2.03	2.51	-	2.4	4.23
123	Ca_21525	AtPUB12,PUB12; ATPUB13,PUB13	AUTONOMOUS	-	-	-	-	-1.4	-1.21
124	Ca_21576	ATPIF4, PHYTOCHROME INTERACTING FACTOR 4, PIF4, SRL2_x000D_	PHOTOPERIOD + CIRCADIAN CLOCK	2.89	4.24	4.54	4.98	4.51	3.84
125	Ca_22199	ATCDPK3,ATCPK6,CPK6	PHOTOPERIOD + CIRCADIAN CLOCK	-	-	-	-1.01	-	-
126	Ca_22267	ATCDPK3,ATCPK6,CPK6	PHOTOPERIOD + CIRCADIAN CLOCK	-	-	-	-	-2.03	-1.85
127	Ca_22312	ATCDPK3,ATCPK6,CPK6	PHOTOPERIOD + CIRCADIAN CLOCK	1.47	1.24	-	-	-	1.08
128	Ca_22383	CDF2	PHOTOPERIOD + CIRCADIAN CLOCK	-1.17	-	-1.68	1.83	-1.66	-3.11
129	Ca_23164	AT-PHH1,ATCRY2,CRY2,FHA,PHH1	PHOTOPERIOD + CIRCADIAN CLOCK	1.02	1.04	1.39	1.06	1.48	2.36
130	Ca_23529	ATKS,ATKS1,GA2,KS,KS1	HORMONE	-	-	-	-	-	-1.12
131	Ca_23533	APL,WDY	PHOTOPERIOD + CIRCADIAN CLOCK	1.79	1.4	1.36	-	1.61	1.32
132	Ca_23894	ABH1,ATCBP80,CBP80,ENS	AUTONOMOUS	-	-1.11	-1.35	-1.64	-	-
133	Ca_24123	ATTEM1, EDF1, ETHYLENE RESPONSE DNA BINDING FACTOR 1, TEM1, TEMPRANILLO 1	DEVELOPMENT	1.37	2.5	3.37	3.3	2.24	-
134	Ca_24925	AGL15	PHOTOPERIOD + CIRCADIAN CLOCK	-2.04	-2.33	-3.15	-2.45	-3.64	-4.78
135	Ca_25805	GA5, GA20OX1, AT2301, ATGA20OX1	HORMONE	1.79	1.73	-	-	-	2.07
136	Ca_25923	CRY1, BLU1, HY4, OOP2, ATCRY1	PHOTOPERIOD + CIRCADIAN CLOCK	1.55	2.31	2.16	2.64	2.25	2.1
137	Ca_25929	CDF3	PHOTOPERIOD + CIRCADIAN CLOCK	-	1.59	-	2.9	-	-
138	Ca_26523	ATPRMT10,PRMT10	AUTONOMOUS	-	-1.14	-1.09	-1.62	-1.18	-
139	Ca_26853	ATTPS1,TPS1	SUGAR	1.92	2.1	1.22	1.49	3.57	3.29
140	Ca_27098	ATSUC9,SUC9	SUGAR	-3.77	-3.94	-	-3.24	-4.32	-
141	Ca_27247	VIP5	VERNALIZATION + TEMPERATURE	-6.82	-6.25	-4.78	-6.02	-6.74	-
142	Ca_27770	LNK2	PHOTOPERIOD + CIRCADIAN CLOCK	1.6	2.01	1.5	2.62	1.21	1.4
143	Ca_FTa1	FTa1	DEVELOPMENT	-	1.18	-	-	-	-
144	Ca_FTb	FTb	DEVELOPMENT	1.24	1.39	-	-	-	-
145	Ca_TFL1c2	TFL1c2	DEVELOPMENT	-1.16	-1.23	-	-2.74	-3.46	-4.26
146	Ca_TFL1c3	TFL1c3	DEVELOPMENT	-	-	-	-4.66	-5.66	-
