# Supplementary material for: Transcriptomic Analysis of Flowering Time Genes in Cultivated Chickpea and Wild Cicer
Source: Int J Mol Sci. 2023 Jan 31;24(3):2692. doi: 10.3390/ijms24032692 (PMC9916832; doi:10.3390/ijms24032692)
Supplement: Supplementary file 1 [file ijms-24-02692-s001.zip › Supplementary Table S6.xlsx]

## Sheet: leaves_before
Supplementary Table 6. Differential gene expression between species/accessions in the leaves BF
	CA_ID	name	pathway	log2 arietinum vern+ / mutant vern+	log2 arietinum vern- / mutant vern-	log2 arietinum vern+ / echinospermum vern+	log2 arietinum vern+ / reticulatum vern+	log2 mutant vern+ / echinospermum vern+	log2 mutant vern+ / reticulatum vern+	log2 echinospermum vern+ / reticulatum vern+
1	Ca_00020	FTIP1	DEVELOPMENT	-	-	-3.58	-	-4.99	-	4.92
2	Ca_00127	LNK1	PHOTOPERIOD + CIRCADIAN CLOCK	-	-	1.58	1.09	1.99	1.5	-
3	Ca_01365	LHY,LHY1	PHOTOPERIOD + CIRCADIAN CLOCK	-	-	4.47	2.29	4.98	2.8	-2.19
4	Ca_01394	ICE1	VERNALIZATION + TEMPERATURE	-	-	1.47	1.35	1.94	1.83	-
5	Ca_01826	ATPRMT5,PRMT5,SKB1	AUTONOMOUS	-	-	-	-	-1.57	-	-
6	Ca_02845	ATGA3OX1,GA3OX1,GA4	HORMONE	-	-	-	1.27	-	1.71	-
7	Ca_03475	ATSUS4,SUS4	SUGAR	-	-	-	-	-	4.52	4.16
8	Ca_04778	CIB1	PHOTOPERIOD + CIRCADIAN CLOCK	-	-	-	-1.07	-	-1.17	-
9	Ca_06280	AGL6,RSB1	DEVELOPMENT	-	-2.33	2.37	3.85	3.42	4.9	-
10	Ca_06865	SPA4; SPA3	PHOTOPERIOD + CIRCADIAN CLOCK	-	-	1.2	-	1.4	-	-
11	Ca_08305	ATGID1B, GID1B	HORMONE	-	2.35	-	-	-	-	-
12	Ca_09180	ATH1	DEVELOPMENT	-	-	-	1.53	-	-	-
13	Ca_09766	FTIP1	DEVELOPMENT	-	-	-	2.19	-	3.75	-
14	Ca_09815	ORTH2,VIM1; ORTH1,VIM3; ORTH5,VIM2	AUTONOMOUS	-	-	-1.6	-	-	-	-
15	Ca_10518	ATMYB30,MYB30	AUTONOMOUS	-	-	-	-	-	1.25	-
16	Ca_11893	ATGA2OX8,GA2OX8	HORMONE	-	-	-	-	2.04	-	-
17	Ca_12381	AGL7,AP1,AtAP1	INTEGRATORS + MAIN TARGETS	-	-	-	1.36	-	-	-
18	Ca_12986	VIL1,VRN5	VERNALIZATION + TEMPERATURE	-	-	1.02	-	1.01	-	-
19	Ca_13690	BBX24,STO	PHOTOPERIOD + CIRCADIAN CLOCK	-	-	-	-	-	1.07	-
20	Ca_14475	CPK33	PHOTOPERIOD + CIRCADIAN CLOCK	-	-	-1.37	-	-	-	-
21	Ca_14764	TPL,WSIP1,TPL,WSIP1,TPL,WSIP1	INTEGRATORS + MAIN TARGETS	-	-	2.08	-	1.86	-	-2.06
22	Ca_15371	ATGRP7,CCR2,GR-RBP7,GRP7	AUTONOMOUS	-	-	-	-	-2.03	-	-
23	Ca_16243	SPL5	DEVELOPMENT	-	-	1.47	-	2.81	2.31	-
24	Ca_16660	CHC1	AUTONOMOUS	-	-	-	-1.91	-	-1.35	-1.41
25	Ca_17820	ATCOP1,COP1,DET340,EMB168,FUS1	PHOTOPERIOD + CIRCADIAN CLOCK	-	-	-	-	1.16	-	-
26	Ca_18331	ATSUS4,SUS4	SUGAR	-	1.71	-	-	-	-	-
27	Ca_19141	FT,RSB8	DEVELOPMENT	-	-	-	-	2.9	-	-
28	Ca_19710	FTIP1	DEVELOPMENT	-	-	2.2	1.81	2.15	1.76	-
29	Ca_19854	AGL18	PHOTOPERIOD + CIRCADIAN CLOCK	-	-	1.6	1.47	1.56	1.42	-
30	Ca_21260	SPA1	PHOTOPERIOD + CIRCADIAN CLOCK	-	-	-1.41	-	-	-	-
31	Ca_22267	ATCDPK3,ATCPK6,CPK6	PHOTOPERIOD + CIRCADIAN CLOCK	-	-	-	1.13	-	-	-
32	Ca_22312	ATCDPK3,ATCPK6,CPK6	PHOTOPERIOD + CIRCADIAN CLOCK	-	1.49	-	-	-	-	-
33	Ca_22383	CDF2	PHOTOPERIOD + CIRCADIAN CLOCK	-	-	3.01	1.43	3.99	2.41	-1.58
34	Ca_23164	AT-PHH1,ATCRY2,CRY2,FHA,PHH1	PHOTOPERIOD + CIRCADIAN CLOCK	-	-	1.33	-	1.02	-	-1.23
35	Ca_23529	ATKS,ATKS1,GA2,KS,KS1	HORMONE	-	-	1.53	-	1.86	-	-1.24
36	Ca_24925	AGL15	PHOTOPERIOD + CIRCADIAN CLOCK	-	-	2.58	-	2.38	-	-
37	Ca_25805	GA5, GA20OX1, AT2301, ATGA20OX1	HORMONE	-	-	-	-	2.11	2.41	-
38	Ca_25929	CDF3	PHOTOPERIOD + CIRCADIAN CLOCK	-	-	2.2	-	2.77	1.42	-1.34
39	Ca_27770	LNK2	PHOTOPERIOD + CIRCADIAN CLOCK	-	-	-	-	-	1.35	-
40	Ca_TFL1c2	TFL1c2	DEVELOPMENT	-	-	6.56	3.27	4.8	-	-3.29
41	Ca_TFL1c3	TFL1c3	DEVELOPMENT	-	-	5.2	4.65	-	-	-
