# Supplementary material for: Transcriptomic Analysis of Flowering Time Genes in Cultivated Chickpea and Wild Cicer
Source: Int J Mol Sci. 2023 Jan 31;24(3):2692. doi: 10.3390/ijms24032692 (PMC9916832; doi:10.3390/ijms24032692)
Supplement: Supplementary file 1 [file ijms-24-02692-s001.zip › Supplementary Table S7.xlsx]

## Sheet: leaves_after
Supplementary Table 7. Differential gene expression between species/accessions in the leaves AF
	CA_ID	name	pathway	log2 arietinum vern+ / mutant vern+	log2 arietinum vern- / mutant vern-	log2 arietinum vern+ / echinospermum vern+	log2 arietinum vern+ / reticulatum vern+	log2 mutant vern+ / echinospermum vern+	log2 mutant vern+ / reticulatum vern+	log2 echinospermum vern+ / reticulatum vern+
1	Ca_00020	FTIP1	DEVELOPMENT	-	-	-4.54	-	NA	-	5.7
2	Ca_01365	LHY,LHY1	PHOTOPERIOD + CIRCADIAN CLOCK	-2.45	-	-2.45	-	-	-	-
3	Ca_01386	LFY,LFY3	DEVELOPMENT	-	-	-	-1.15	-	-2.07	-
4	Ca_01394	ICE1	VERNALIZATION + TEMPERATURE	-	-	-	-	-	1.24	-
5	Ca_01620	ELF3,PYK20	PHOTOPERIOD + CIRCADIAN CLOCK	-	-	-	-	1.11	-	-
6	Ca_01826	ATPRMT5,PRMT5,SKB1	AUTONOMOUS	2.57	2.44	1.13	1.31	-1.44	-	-
7	Ca_02166	CLF,ICU1,SDG1,SET1	INTEGRATORS + MAIN TARGETS	1.15	-	-	-	-	-	-
8	Ca_02432	ATECS1,AtGSH1,CAD2,GSH1,GSHA,PAD2,RML1	AUTONOMOUS	-	-	-	-2.21	NA	-	-
9	Ca_03475	ATSUS4,SUS4	SUGAR	-	-	-	3.58	-	4.51	4.56
10	Ca_04056	APRR5,PRR5	PHOTOPERIOD + CIRCADIAN CLOCK	-	-	2.56	-	2.41	-	-2.36
11	Ca_04321	ATSUC9,SUC9	SUGAR	-2.46	-	-	-1.8	1.79	-	-
12	Ca_04359	FB,GI	PHOTOPERIOD + CIRCADIAN CLOCK	-	-	1.98	-	1.7	-	-1.82
13	Ca_04521	AT2353,ATGA20OX2,GA20OX2	HORMONE	-2.3	-	-	-1.69	-	-	-
14	Ca_04935	ADG1,APS1	SUGAR	-	-	-	-	-	-1.1	-
15	Ca_06223	FTIP1	DEVELOPMENT	-	-	-	-1.71	-	-	-
16	Ca_06280	AGL6,RSB1	DEVELOPMENT	-	-2.24	-	3.1	-	3.37	3.41
17	Ca_07058	MYR2	PHOTOPERIOD + CIRCADIAN CLOCK	-1.4	-	-	-	1.39	-	-
18	Ca_07256	ATCDPK3,ATCPK6,CPK6	PHOTOPERIOD + CIRCADIAN CLOCK	-	-1.02	-1.46	-1.9	-1.06	-1.5	-
19	Ca_07341	ATGID1B,GID1B	HORMONE	-	-	-	-1.53	-	-	-
20	Ca_07792	HTA11	AUTONOMOUS	2.86	2.34	-	1.96	-2.47	-	1.57
21	Ca_08305	ATGID1B, GID1B	HORMONE	-	-	-	-1.56	-	-	-
22	Ca_08335	AtEMF2,CYR1,EMF2,VEF2	INTEGRATORS + MAIN TARGETS	1.3	-	-	-	-1.2	-	-
23	Ca_08642	ATTPS1,TPS1	SUGAR	-	-	-	3.33	-	-	-
24	Ca_09295	AP2,AtAP2,FL1,FLO2	INTEGRATORS + MAIN TARGETS	-	-	-	-	-1.1	-	-
25	Ca_09815	ORTH2,VIM1; ORTH1,VIM3; ORTH5,VIM2	AUTONOMOUS	2.1	-	-	-	-	-	-
26	Ca_10135	ATHXK1,GIN2,HXK1	SUGAR	-	1.4	-	-	-	-	-
27	Ca_10410	ADO3, FKF1	PHOTOPERIOD + CIRCADIAN CLOCK	-	-	2.5	-	-	-	-2.73
28	Ca_10518	ATMYB30,MYB30	AUTONOMOUS	-1.52	-1.15	-	-	-	-	-
29	Ca_10804	ATHMG,HMG,NFD,SSRP1	VERNALIZATION + TEMPERATURE	-	1.01	-	-	-	-	-
30	Ca_11893	ATGA2OX8,GA2OX8	HORMONE	-	-	-	-	1.59	-	-
31	Ca_12416	AGL22,FAQ1,SVP	INTEGRATORS + MAIN TARGETS	-1.22	-	-1.23	-	-	1.01	1.02
32	Ca_12942	ATTPS1,TPS1	SUGAR	-	-	-	-1.16	-	-	-
33	Ca_13416	ELF4	PHOTOPERIOD + CIRCADIAN CLOCK	-3.23	-	-	-2.29	-	-	-
34	Ca_14215	FTIP1	DEVELOPMENT	-1.17	-	-	-	1.72	-	-1.45
35	Ca_14764	TPL,WSIP1,TPL,WSIP1,TPL,WSIP1	INTEGRATORS + MAIN TARGETS	-	-	2.52	-	2.42	-	-2.43
36	Ca_16243	SPL5	DEVELOPMENT	-	-	-	-1.62	-	-	-2.35
37	Ca_16660	CHC1	AUTONOMOUS	-	-	-1.53	-1	-1.74	-	-
38	Ca_16716	AtNDX,NDX	VERNALIZATION + TEMPERATURE	-	-	-	1.06	-	-	-
39	Ca_17349	MED18	AUTONOMOUS	-	-	-	-	-	1.03	-
40	Ca_17996	FY	AUTONOMOUS	1.27	1.14	-	-	-	-	-
41	Ca_18331	ATSUS4,SUS4	SUGAR	-	-	-	-	1.38	-	-
42	Ca_22383	CDF2	PHOTOPERIOD + CIRCADIAN CLOCK	-1.87	-	-1.87	-	-	-	-
43	Ca_23164	AT-PHH1,ATCRY2,CRY2,FHA,PHH1	PHOTOPERIOD + CIRCADIAN CLOCK	-	-	2.19	-	2.23	-	-1.43
44	Ca_23533	APL,WDY	PHOTOPERIOD + CIRCADIAN CLOCK	-1.13	-	-	-1.15	-	-	-
45	Ca_23894	ABH1,ATCBP80,CBP80,ENS	AUTONOMOUS	1.05	-	-	-	-	-	-
46	Ca_24787	SENSITIVITY TO RED LIGHT REDUCED 1, SRR1_x000D_	PHOTOPERIOD + CIRCADIAN CLOCK	-	-	-	-	-1.22	-	1.31
47	Ca_24925	AGL15	PHOTOPERIOD + CIRCADIAN CLOCK	-	-	-	2.05	-	-	1.77
48	Ca_25805	GA5, GA20OX1, AT2301, ATGA20OX1	HORMONE	-2.24	-3.6	1.98	-	4.22	-	-2.42
49	Ca_26523	ATPRMT10,PRMT10	AUTONOMOUS	-	-	-	1.26	-	-	-
50	Ca_26853	ATTPS1,TPS1	SUGAR	-	-	-	-	1.4	-	-
51	Ca_FTa1	FTa1	DEVELOPMENT	-2.88	-	-	-	2.72	2.47	-
52	Ca_TFL1c2	TFL1c2	DEVELOPMENT	-	2.08	4.86	1.71	3.27	-	-3.14
