# Supplementary material for: Transcriptomic Analysis of Flowering Time Genes in Cultivated Chickpea and Wild Cicer
Source: Int J Mol Sci. 2023 Jan 31;24(3):2692. doi: 10.3390/ijms24032692 (PMC9916832; doi:10.3390/ijms24032692)
Supplement: Supplementary file 1 [file ijms-24-02692-s001.zip › Supplementary Table S8.xlsx]

## Sheet: buds
Supplementary Table 8. Differential gene expression between genotypes in the buds
	CA_ID	name	pathway	log2 arietinum vern+ / mutant vern+	log2 arietinum vern- / mutant vern-	log2 arietinum vern+ / echinospermum vern+	log2 arietinum vern+ / reticulatum vern+	log2 mutant vern+ / echinospermum vern+	log2 mutant vern+ / reticulatum vern+	log2 echinospermum vern+ / reticulatum vern+
1	Ca_00020	FTIP1	DEVELOPMENT	-	-	-1.82	-	-2.78	-	1.63
2	Ca_00497	ATGA2OX2,GA2OX2	HORMONE	-	2.52	-	-	-	-	-
3	Ca_00979	ATSUS4,SUS4	SUGAR	-	2.17	-	-	-1.89	-	-
4	Ca_02452	ATGLK1,GLK1,GPRI1	AUTONOMOUS	-	1.5	-	-	-2.17	-1.44	-
5	Ca_04262	CPK33	PHOTOPERIOD + CIRCADIAN CLOCK	-	-	-	-	1.21	-	-
6	Ca_05924	ATHXK1,GIN2,HXK1	SUGAR	-	-	1.03	-	1.29	-	-
7	Ca_06223	FTIP1	DEVELOPMENT	-	-	-	-	-	-2.25	-
8	Ca_06691	TPL,WSIP1,TPL,WSIP1,TPL,WSIP1	INTEGRATORS + MAIN TARGETS	-	-	-	-	-1.01	-	-
9	Ca_07218	ATINO80,INO80	AUTONOMOUS	-	-	-	-	-1.4	-	-
10	Ca_07341	ATGID1B,GID1B	HORMONE	-	1.61	-	-	-	-	-
11	Ca_07381	ABC33,ATCPS1,CPS,CPS1,GA1	HORMONE	-	-	1.46	-	1.3	-	-1.58
12	Ca_07461	ATHDA6,AXE1,HDA6,RPD3B,RTS1,SIL1	AUTONOMOUS	-	-	-	-	-1.23	-1.87	-
13	Ca_08305	ATGID1B, GID1B	HORMONE	-	2.59	-	-	-2.86	-2.23	-
14	Ca_10955	ATPRMT5,PRMT5,SKB1	AUTONOMOUS	-	-	-1.32	-1.04	-1.82	-1.54	-
15	Ca_10963	ATUBP26,SUP32,UBP26	AUTONOMOUS	-	-	-1.07	-	-1.98	-1.38	-
16	Ca_11893	ATGA2OX8,GA2OX8	HORMONE	-	-	-	1.31	-	-	-
17	Ca_12282	VIP5	VERNALIZATION + TEMPERATURE	1.14	-	-	-	-1.02	-	-
18	Ca_12416	AGL22,FAQ1,SVP	INTEGRATORS + MAIN TARGETS	-	-	1.93	-	2.02	-	-1.25
19	Ca_12942	ATTPS1,TPS1	SUGAR	-	-	-	-	1.26	-	-
20	Ca_14215	FTIP1	DEVELOPMENT	-	-	-	-	1.33	-	-
21	Ca_14223	AKS3,FBH4	PHOTOPERIOD + CIRCADIAN CLOCK	-	-	-	-	1.22	1.63	-
22	Ca_14391	ATSUS4,SUS4	SUGAR	-	-	-2.11	1.1	-1.4	1.8	3.2
23	Ca_14764	TPL,WSIP1,TPL,WSIP1,TPL,WSIP1	INTEGRATORS + MAIN TARGETS	-	-	1.35	-	1.36	-	-1.42
24	Ca_16024	SUVR5	AUTONOMOUS	-	-	-2.35	-	-4.6	-2.72	1.87
25	Ca_16716	AtNDX,NDX	VERNALIZATION + TEMPERATURE	-	-	1.39	1.4	1.33	1.35	-
26	Ca_19710	FTIP1	DEVELOPMENT	-	-	-	-	-1.75	-	1.33
27	Ca_20764	ATCDPK3,ATCPK6,CPK6	PHOTOPERIOD + CIRCADIAN CLOCK	-	-	-	-	1.43	-	-
28	Ca_21576	ATPIF4, PHYTOCHROME INTERACTING FACTOR 4, PIF4, SRL2_x000D_	PHOTOPERIOD + CIRCADIAN CLOCK	-	1.17	-	-	-	-	-
29	Ca_22267	ATCDPK3,ATCPK6,CPK6	PHOTOPERIOD + CIRCADIAN CLOCK	-	1.28	-	-	-2.65	-1.98	-
30	Ca_23164	AT-PHH1,ATCRY2,CRY2,FHA,PHH1	PHOTOPERIOD + CIRCADIAN CLOCK	-	-	2.64	-	2.31	-	-2.11
31	Ca_24123	ATTEM1, EDF1, ETHYLENE RESPONSE DNA BINDING FACTOR 1, TEM1, TEMPRANILLO 1	DEVELOPMENT	-	2.09	-1.64	-	-2.85	-	1.67
32	Ca_25805	GA5, GA20OX1, AT2301, ATGA20OX1	HORMONE	-	-	-	-	2.24	-	-
33	Ca_26853	ATTPS1,TPS1	SUGAR	-	-	1.18	-	2.05	1.85	-
34	Ca_27098	ATSUC9,SUC9	SUGAR	-	3.75	5.34	-	4.37	-	-5.64
35	Ca_27247	VIP5	VERNALIZATION + TEMPERATURE	-	-	4.22	-	4	-	-4.56
36	Ca_TFL1c2	TFL1c2	DEVELOPMENT	-	-	3.52	-	3.27	-	-2.49
37	Ca_TFL1c3	TFL1c3	DEVELOPMENT	-	-	6.1	-	5.12	-	-5.71
